# Supplementary material for: Synonymous Constraint Elements Show a Tendency to Encode Intrinsically Disordered Protein Segments
Source: PLoS Comput Biol. 2014 May 8;10(5):e1003607. doi: 10.1371/journal.pcbi.1003607 (PMC4014394; doi:10.1371/journal.pcbi.1003607)
Supplement: Table S2 — Locations and predicted structural properties of protein regions overlapping the SCEs of the 15-codon resolution dataset. (XLSX) [file pcbi.1003607.s004.xlsx]

## Sheet: Munka1
Table S2: Locations and predicted structural properties of protein regions overlapping the SCEs of the 15 codons resolution dataset.
Ensembl 54 protein ID	SCE start position	SCE end position	Length of SCE overlap	Ratio of disordered residues	Ratio of low complexity residues	Ratio of residues in domains	Ratio of secondary structure residues
ENSP00000376304	2	16	15	0	0	0	0.4667
ENSP00000357834	157	176	20	0.05	0	0.45	0.35
ENSP00000372479	448	462	15	0	0	1	0.4
ENSP00000366628	7	21	15	0	0.4	0.2667	0.4
ENSP00000366628	47	61	15	0	1	1	1
ENSP00000346659	652	676	25	0	0.56	1	0.8
ENSP00000357826	217	231	15	0	0.3333	0	0.7333
ENSP00000261609	1742	1756	15	0	0	0	1
ENSP00000372750	492	511	20	0	0	0.2	0.9
ENSP00000290374	2	21	20	0	0	0.95	0.85
ENSP00000348673	302	316	15	0	0	0	0.6
ENSP00000326296	422	446	25	1	0.6	0	0.04
ENSP00000287598	62	76	15	0	0	1	0.5333
ENSP00000372135	12	26	15	0.6	0	0	0.0667
ENSP00000372135	257	271	15	1	0	0	0.3333
ENSP00000342391	757	776	20	0	0	0.85	0.5
ENSP00000307297	7	21	15	0.8	0.3333	0	0.3333
ENSP00000355205	2	16	15	0.4667	0	0	0
ENSP00000371475	1017	1031	15	1	0	0	0.4
ENSP00000371275	52	81	30	0.0333	0	0.9333	0.2333
ENSP00000305711	2	16	15	0	1	0	0.0667
ENSP00000305711	492	521	30	0	0.8	0	1
ENSP00000305711	542	566	25	0	0	0	0.8
ENSP00000261866	1022	1036	15	0	0	0	0.4667
ENSP00000290894	307	321	15	0.4	0	0	0
ENSP00000315006	212	226	15	0	0	1	0.7333
ENSP00000379895	32	46	15	0.1333	0	0	0.8
ENSP00000379895	327	346	20	0	0.55	0	0.5
ENSP00000329668	12	26	15	0	0	0	0.4667
ENSP00000302239	7	21	15	0	0	1	0.4667
ENSP00000261854	227	241	15	0	0.7333	1	1
ENSP00000335196	107	121	15	0.3333	0	0	0.6
ENSP00000251076	47	66	20	0	0	0	0.5
ENSP00000251076	1167	1181	15	0	0	0	0.4667
ENSP00000385752	2	16	15	0	0	0	0.6667
ENSP00000385752	27	51	25	0	0	1	0.56
ENSP00000385752	217	231	15	0	0	1	0.6
ENSP00000379619	1052	1076	25	1	0	0	0
ENSP00000342169	332	346	15	0.3333	0	0	0.8
ENSP00000260408	32	51	20	0	0	0.75	0.55
ENSP00000369887	152	171	20	1	0.85	0	0.45
ENSP00000261520	952	971	20	1	0	0	0.15
ENSP00000350667	104	118	15	0.8667	0	1	1
ENSP00000261893	217	231	15	0	0	1	0.5333
ENSP00000379136	67	81	15	0	0	1	0.9333
ENSP00000300026	62	81	20	0	0	1	0.6
ENSP00000369579	172	186	15	0	0	1	0.3333
ENSP00000204549	107	121	15	1	1	0	0
ENSP00000319623	367	381	15	0.4	0	1	0.2
ENSP00000319623	542	556	15	0.0667	0	1	0.3333
ENSP00000330221	192	206	15	0	0	1	0.5333
ENSP00000326379	342	356	15	0.2	0	0	0.6
ENSP00000386908	1002	1031	30	0.5	0	0	0.1
ENSP00000288840	2	26	25	0.88	0.24	0	0.28
ENSP00000288840	62	76	15	1	1	0	0.1333
ENSP00000332973	147	161	15	0.5333	0	0	0
ENSP00000307298	257	271	15	0	0	0	0.2667
ENSP00000307298	592	621	30	0	0	0	0.6333
ENSP00000378803	302	326	25	0	0	0	0.56
ENSP00000348349	182	196	15	0	0	1	0.4667
ENSP00000348349	982	996	15	0	0	1	0.3333
ENSP00000287196	232	246	15	0	0	0	0
ENSP00000369217	157	171	15	0.1333	0	0	0.4
ENSP00000261917	1152	1166	15	1	0.6667	0	0
ENSP00000290401	32	51	20	0.15	0	0.55	0.3
ENSP00000290401	57	126	70	0.1286	0	0.9286	0.6286
ENSP00000290401	132	146	15	0	0	0	0.8667
ENSP00000378591	142	156	15	1	0.2	0	0.1333
ENSP00000378515	152	166	15	1	0	0	0
ENSP00000328452	2	16	15	0.4667	0.1333	0	0
ENSP00000317691	2	16	15	0.8	0.5333	0	0.1333
ENSP00000317691	47	71	25	0.04	0	1	0.56
ENSP00000317691	82	106	25	0.28	0	0.72	0.84
ENSP00000378402	512	526	15	0	0	0.7333	0.6667
ENSP00000303554	262	276	15	0	0	0	0.3333
ENSP00000307833	162	176	15	0	0	0	0.4
ENSP00000378324	271	285	15	0	0	0	0.4667
ENSP00000258886	367	391	25	0	0	1	0.44
ENSP00000261752	27	51	25	0.08	0	1	0.52
ENSP00000261752	1162	1176	15	0	0	1	0.6
ENSP00000267984	2	26	25	0.96	0.56	0	0
ENSP00000267984	317	361	45	0.4889	0	0	0.3778
ENSP00000329918	92	121	30	0.1667	0	1	0.4667
ENSP00000286744	542	566	25	0.2	0	0	0.48
ENSP00000258888	147	176	30	1	0.4667	0	0.1667
ENSP00000336800	7	21	15	0.2667	0	0	0.3333
ENSP00000336800	562	576	15	0	0	0.4667	0.2667
ENSP00000268124	172	206	35	0.0286	0.0286	0	0.4571
ENSP00000268138	107	121	15	0	0	0	0.2667
ENSP00000268138	862	886	25	0.44	0	0	0.6
ENSP00000300055	492	516	25	1	0	0	0.12
ENSP00000300060	937	951	15	0	0	0	0.8667
ENSP00000268154	352	371	20	0	0	1	0.65
ENSP00000331897	432	446	15	0	0	0.6	0.6667
ENSP00000268171	2	16	15	0	0.6667	0	0.6
ENSP00000268171	67	91	25	0.56	0.52	0	0.12
ENSP00000268159	407	421	15	0	0	1	0.6667
ENSP00000320634	177	191	15	0	0	1	0.7333
ENSP00000320634	262	281	20	0	1	1	0.85
ENSP00000320634	657	686	30	0	0	0	0.3
ENSP00000377747	1807	1821	15	1	0	0	0.4667
ENSP00000329908	377	396	20	0	0	0.5	0.75
ENSP00000268042	37	61	25	0	0	1	0.76
ENSP00000268035	1312	1326	15	1	0.4	0	0
ENSP00000352148	87	101	15	0	0	0	0.9333
ENSP00000026218	542	561	20	0	0	0	0.25
ENSP00000250894	213	247	35	0.9143	0.3429	0	0.2857
ENSP00000268668	7	26	20	0.45	0	0	0.15
ENSP00000341885	2	16	15	1	0.7333	0	0
ENSP00000301738	127	146	20	0	0	0.45	0.75
ENSP00000357683	47	61	15	1	0.8	0	0.9333
ENSP00000380079	282	296	15	0.2667	0	1	0
ENSP00000371502	110	139	30	1	0.4333	0	0.3333
ENSP00000371502	205	234	30	1	0.4667	0	0.4333
ENSP00000371502	340	354	15	1	0	0	0
ENSP00000371502	527	541	15	1	1	0	0
ENSP00000371502	1902	1916	15	1	0.6	0	0
ENSP00000371502	2372	2401	30	1	0.9333	0	0
ENSP00000371502	2422	2436	15	1	0	0	0.0667
ENSP00000262366	7	21	15	0.5333	0	0	0.7333
ENSP00000262366	152	166	15	0	0	0	0.0667
ENSP00000262375	17	31	15	0.3333	0	0	0
ENSP00000383962	282	296	15	0	0	0	0.4667
ENSP00000283474	137	156	20	1	1	0	0
ENSP00000384256	107	121	15	0	0	0	0.9333
ENSP00000322716	127	151	25	1	0.44	0	0.24
ENSP00000262376	2	16	15	0.8667	0	0	0.3333
ENSP00000262376	747	761	15	1	0	0	0
ENSP00000309117	177	196	20	0.5	0	1	0.75
ENSP00000331720	167	186	20	0.9	0.55	0	0.1
ENSP00000379818	12	36	25	0	0	0	0.48
ENSP00000379818	1337	1351	15	0.8	0.4667	1	0
ENSP00000379818	1422	1456	35	0.5143	0	1	0.3143
ENSP00000329418	2	26	25	1	0.52	0	0.12
ENSP00000379773	947	971	25	0	0	0	0.32
ENSP00000348535	297	311	15	0	0.2667	1	0.9333
ENSP00000261658	42	56	15	0	0	1	0.4
ENSP00000198767	427	441	15	0	0	1	0.7333
ENSP00000379654	87	111	25	0.08	0	0	0.16
ENSP00000379654	622	636	15	1	0	0	0.0667
ENSP00000357564	2	16	15	0	0	0.4667	0.8
ENSP00000261377	337	351	15	0	0	1	0.8667
ENSP00000261383	3557	3571	15	0	0	1	0.6
ENSP00000219599	202	216	15	0	0	1	0.6
ENSP00000261374	2	26	25	0.28	0.76	0	0.6
ENSP00000261374	307	326	20	0	0	1	0.1
ENSP00000261374	342	356	15	0	0	0.6	0.7333
ENSP00000219689	1337	1351	15	1	0.2667	0	0.2
ENSP00000300061	507	521	15	0	0	1	0.2
ENSP00000219638	506	530	25	0	0	0	0.56
ENSP00000007516	107	121	15	0	0	1	0.5333
ENSP00000007516	137	151	15	0	0	0.8	0.4667
ENSP00000305355	622	671	50	0.16	0	0.76	0.18
ENSP00000005284	17	56	40	0.2	0	1	0.45
ENSP00000379146	359	388	30	1	0	0	0.1667
ENSP00000379146	464	483	20	1	0	0	0.3
ENSP00000379146	1354	1368	15	1	0.2667	0	0
ENSP00000379146	1909	1928	20	0	0	0	0
ENSP00000289932	382	401	20	0	0.4	1	0.8
ENSP00000355343	887	906	20	0.7	0.5	0	0.15
ENSP00000355343	1057	1086	30	0.8667	0.3667	0	0.0333
ENSP00000378917	872	886	15	1	0	0	0
ENSP00000378917	897	911	15	1	0	0	0
ENSP00000378917	917	936	20	1	1	0	0
ENSP00000322439	2	16	15	0	0.8	0	0.6667
ENSP00000378879	815	829	15	0	0	0	1
ENSP00000309945	107	131	25	0	0	1	0.48
ENSP00000309945	277	291	15	0	0	1	0.5333
ENSP00000326519	7	26	20	1	0	0	0
ENSP00000357475	107	131	25	0	0.16	0.56	0.64
ENSP00000311202	152	166	15	0	0	0	0.5333
ENSP00000310094	732	811	80	1	0.1875	0	0.275
ENSP00000303977	107	121	15	1	0.6	0	0
ENSP00000279387	2	16	15	0	0	0	0.7333
ENSP00000279387	72	86	15	0	0	1	0.2667
ENSP00000378650	282	296	15	1	0	0	0.6
ENSP00000369777	2	21	20	1	0	0	0
ENSP00000287461	17	31	15	0.6	0.8	0.1333	0.1333
ENSP00000300835	232	246	15	0.6667	0.8	0	0
ENSP00000369719	1567	1581	15	0.8667	1	0	0.4667
ENSP00000369719	1852	1886	35	1	0.8286	0	0.0571
ENSP00000369719	1927	1951	25	0.76	0	0	0.16
ENSP00000329968	67	81	15	0.2667	0	1	1
ENSP00000384942	972	986	15	0	0	1	0.4
ENSP00000322249	37	61	25	0	0	0.76	0.8
ENSP00000357461	317	331	15	0	0	1	0.3333
ENSP00000378405	127	141	15	0	0	1	0.6
ENSP00000254108	492	506	15	1	1	0	0
ENSP00000292205	845	869	25	0.24	0.48	0	0.52
ENSP00000311030	1247	1261	15	0	0	1	0.4
ENSP00000285737	2	16	15	0	0	0.2667	0.1333
ENSP00000285737	717	736	20	0	0	1	0.25
ENSP00000251020	162	186	25	0.68	0.56	0	0.12
ENSP00000251020	267	301	35	0.4286	0.5714	0	0.5143
ENSP00000251020	387	406	20	0.6	0.35	0	0
ENSP00000251020	1012	1036	25	0	0	0.8	0.4
ENSP00000251020	1062	1076	15	0.7333	0	0	0.1333
ENSP00000251020	1202	1216	15	0.2667	0	0	0.3333
ENSP00000251020	1252	1266	15	0.6667	0.6667	0	0.3333
ENSP00000331608	102	116	15	0.4667	0.9333	0	0.2
ENSP00000331608	172	186	15	0	0	0.8667	1
ENSP00000262134	22	46	25	0	0.44	0	0
ENSP00000262494	7	31	25	0.04	0	1	0.8
ENSP00000300291	112	126	15	0.0667	0	0	0.6667
ENSP00000310668	2	16	15	0.8667	0.6	0	0.7333
ENSP00000290776	532	546	15	0.4667	0	0	0.2
ENSP00000219207	77	91	15	0	0	1	1
ENSP00000258214	77	91	15	1	0.8	0	1
ENSP00000219281	152	166	15	0	0	1	0.5333
ENSP00000377823	242	256	15	0	0	1	0.6
ENSP00000320949	157	171	15	0	0	0	0.3333
ENSP00000320949	222	241	20	0	0	0	0.4
ENSP00000219320	432	446	15	0	0	1	0.8667
ENSP00000299345	767	786	20	0.2	0.2	1	0.2
ENSP00000268603	242	256	15	0.4	0	1	0.3333
ENSP00000268603	422	446	25	0.12	0	1	0.24
ENSP00000268603	762	796	35	0.2	0	0.7714	0.4286
ENSP00000357411	427	441	15	0	0	0.8	0.4
ENSP00000290949	2	16	15	0	0	0.1333	0.3333
ENSP00000368614	2	26	25	0.2	0	0	0.44
ENSP00000264010	192	211	20	1	0.5	0	0.2
ENSP00000264010	437	451	15	0	0	1	0.4
ENSP00000304689	47	61	15	0.1333	0	1	0.1333
ENSP00000351811	2	16	15	0	0	0	0.6667
ENSP00000291041	2	16	15	0.7333	0	0	0
ENSP00000318557	7	31	25	0.28	0	0	0.16
ENSP00000351769	197	211	15	0	0	1	0.8667
ENSP00000300659	42	86	45	0.2889	0.4	0	0.2
ENSP00000251366	692	711	20	0.1	0	0	0.05
ENSP00000219334	397	411	15	0	0	1	0.4
ENSP00000219334	472	506	35	0	0	1	0.5429
ENSP00000327179	22	36	15	0	0	1	0.4667
ENSP00000338191	2	26	25	0	0.56	0	0.72
ENSP00000338191	172	186	15	0.5333	0	1	0.8
ENSP00000338191	287	316	30	0	0	0	0.9
ENSP00000254940	142	171	30	0	0	1	0.3667
ENSP00000254942	482	496	15	0	0	0.8667	0.9333
ENSP00000345477	307	321	15	0	0	1	0.2
ENSP00000357394	2	16	15	0	0	0	0.7333
ENSP00000305790	7	21	15	0	0	0	0.7333
ENSP00000261776	172	186	15	0	0	0	0.8667
ENSP00000357393	2	16	15	0	1	0	0.5333
ENSP00000268489	2	46	45	1	0	0	0.0667
ENSP00000268489	207	231	25	0	0	0	0.24
ENSP00000268489	407	431	25	0.92	0.2	0	0
ENSP00000268489	517	541	25	1	0	0	0.28
ENSP00000268489	552	586	35	0.7714	0.1714	0	0.3143
ENSP00000268489	592	611	20	1	0	0	0
ENSP00000268489	2437	2456	20	1	0.65	0	0.3
ENSP00000268489	3022	3051	30	0	0	0	0.5333
ENSP00000268489	3357	3371	15	0.2	0.8	0	0.8667
ENSP00000268489	3397	3466	70	0.8	0.2571	0	0.1
ENSP00000268489	3527	3701	175	0.8743	0.3829	0	0.2
ENSP00000219368	37	51	15	0.2667	0	1	0.6667
ENSP00000323362	107	141	35	0.2	0	0	0.1429
ENSP00000350230	67	101	35	0	0	1	0.6857
ENSP00000282849	82	126	45	0	0	1	0.6
ENSP00000282849	142	156	15	0	0	1	0.4
ENSP00000282849	497	511	15	0	0	0.1333	0
ENSP00000327048	7	26	20	0.2	0	0	0.25
ENSP00000312129	352	366	15	0	0	1	0.6
ENSP00000253458	7	56	50	1	0.28	0	0.16
ENSP00000326272	42	56	15	0	0	0.5333	0.2667
ENSP00000268616	97	111	15	0.2667	0	0	0.2667
ENSP00000268616	667	686	20	0.05	0	0	0.5
ENSP00000284262	77	106	30	0	0	0.6333	0.2
ENSP00000270583	17	31	15	1	0.9333	0	0.7333
ENSP00000270583	72	86	15	0	0	0	0.4667
ENSP00000268679	107	121	15	0.4667	0	0	0.2
ENSP00000306080	207	231	25	0	0	0.88	0.52
ENSP00000337443	42	56	15	0	0	0	0.8
ENSP00000303909	802	816	15	0	0	0.5333	0.3333
ENSP00000357360	137	161	25	0.36	0	0.24	0.28
ENSP00000300574	222	241	20	0.7	0	0.15	0.2
ENSP00000371582	2	16	15	0	0	0	0.8
ENSP00000371582	22	41	20	0	0	0	0.95
ENSP00000304350	7	21	15	0.5333	0	0	0
ENSP00000304350	272	286	15	0	0	0	0.0667
ENSP00000263073	2	26	25	0.56	0	0	0.64
ENSP00000174618	7	21	15	0.8667	0.4	0	1
ENSP00000174618	352	366	15	1	0.0667	0	0.3333
ENSP00000380371	173	187	15	0	0	1	0.2667
ENSP00000357354	468	487	20	1	0.75	0	0.05
ENSP00000373657	587	611	25	1	0.2	0	0.6
ENSP00000371051	567	581	15	0	0	0	0.4667
ENSP00000371051	762	776	15	0	0	0	0.6
ENSP00000371051	1292	1356	65	0	0	0	0.6462
ENSP00000225665	2	31	30	0.1667	0	0.3	0.1667
ENSP00000225665	297	311	15	0	0	0.8	0.9333
ENSP00000357345	228	272	45	0	0	1	0.4222
ENSP00000225296	67	81	15	0.1333	0	0	0.7333
ENSP00000357342	22	36	15	1	0.8	0	0
ENSP00000357342	212	226	15	0	0.8	1	1
ENSP00000310490	27	41	15	0.3333	0.9333	0	0.2667
ENSP00000310490	77	91	15	0	0.7333	1	0.9333
ENSP00000336702	32	46	15	0	0	0	0
ENSP00000305288	72	86	15	0.4667	0	1	0
ENSP00000305288	92	116	25	0.52	0	1	0
ENSP00000315387	382	396	15	0	1	1	0.9333
ENSP00000293829	47	61	15	0.2667	0	0	0.3333
ENSP00000293826	2	21	20	0.85	0.7	0	0.5
ENSP00000293826	2	26	25	0.68	0.76	0	0.6
ENSP00000366284	893	932	40	0.575	0.225	0	0.225
ENSP00000366284	938	972	35	0.5429	0.1714	0	0.1143
ENSP00000226091	207	226	20	1	0	0	0
ENSP00000226091	232	271	40	0.55	0.625	0	0.4
ENSP00000332103	2	16	15	0	0.6667	0	0.6
ENSP00000302719	12	31	20	1	0.45	0	0.05
ENSP00000314420	697	711	15	0.6	0	0	0.3333
ENSP00000357330	2	21	20	1	0	0	0.1
ENSP00000357330	227	241	15	1	1	0	0
ENSP00000357330	1607	1621	15	1	0	0	0.4
ENSP00000308220	257	276	20	0	0	0	0.25
ENSP00000328017	122	141	20	0	0.1	0	0.5
ENSP00000353590	12	26	15	0	0	0	0.6667
ENSP00000173229	62	81	20	0	0	1	0.45
ENSP00000252173	187	201	15	0	0	1	0.8
ENSP00000252173	1537	1551	15	0.2667	0.4667	1	1
ENSP00000255381	1772	1786	15	1	0	1	0.7333
ENSP00000226207	192	206	15	0	0	1	0.8
ENSP00000226207	492	506	15	0	0	1	0.9333
ENSP00000226207	767	786	20	0	0	0.2	0.95
ENSP00000245503	492	506	15	0	0	1	0.9333
ENSP00000245503	1007	1021	15	0.8667	0	0	0.8
ENSP00000245503	1892	1906	15	1	0	1	0.7333
ENSP00000226209	532	551	20	0	0	1	0.4
ENSP00000226209	932	946	15	0.6	0.5333	0	0.8667
ENSP00000226209	1677	1691	15	0.3333	0	1	1
ENSP00000226209	1782	1796	15	0.8667	0	1	1
ENSP00000262445	182	196	15	0	0	1	0.7333
ENSP00000337445	32	46	15	1	0	0	0.2
ENSP00000354213	12	36	25	0.64	0.88	0	0.36
ENSP00000354213	212	226	15	0	0	1	0.5333
ENSP00000379264	222	241	20	0	0	1	0.9
ENSP00000379198	342	356	15	0.7333	0.6	0	0.9333
ENSP00000379198	1853	1902	50	0.84	0	0	0.78
ENSP00000379198	1913	1972	60	0.85	0.0833	0	0.4833
ENSP00000386986	197	217	21	0	0	0	0.4762
ENSP00000379168	709	728	20	0	0	0.9	0.3
ENSP00000379122	1492	1506	15	1	0	0	0.2
ENSP00000379122	1677	1726	50	0.18	0.22	0	0.18
ENSP00000268719	62	81	20	0.55	0.85	0	0.05
ENSP00000379048	72	86	15	0	0	0	0.6
ENSP00000379017	2	16	15	0	0	0	0.4
ENSP00000378985	202	236	35	1	0	0	0
ENSP00000225737	67	81	15	0	0	0	0.5333
ENSP00000357307	187	201	15	0.5333	0	1	0.3333
ENSP00000357307	307	321	15	0	0	0.8667	0.5333
ENSP00000316202	127	141	15	0	0	1	0.9333
ENSP00000226247	487	501	15	1	0	0	0
ENSP00000292090	7	26	20	0	1	0	0.8
ENSP00000262395	167	181	15	0	0	0	0.6667
ENSP00000357298	75	89	15	0	0	0	0.6
ENSP00000378298	229	243	15	0	0	1	0.2667
ENSP00000247271	2	16	15	0	0	0	0.9333
ENSP00000316578	2	26	25	0.84	0.8	0	0
ENSP00000316578	67	86	20	0.4	0.05	0	0.35
ENSP00000318486	77	96	20	0.25	0	1	0.25
ENSP00000316532	2	16	15	0.0667	0.7333	0	0.4
ENSP00000326170	2	16	15	0	0	0	0.2
ENSP00000357283	2	21	20	1	0	0	0.25
ENSP00000357283	567	586	20	0.45	0.45	0	0.1
ENSP00000307617	657	671	15	0	0	0	0.6667
ENSP00000251312	52	71	20	0	0	1	0.5
ENSP00000254457	27	46	20	0	0	1	0.3
ENSP00000377904	376	400	25	0.64	0	0	0.24
ENSP00000225893	2	21	20	0	0.75	1	0.7
ENSP00000225893	242	256	15	0.6667	0	1	0.6
ENSP00000308901	27	41	15	0	0	0	0.4
ENSP00000316426	817	846	30	1	1	0	0
ENSP00000316426	892	906	15	0.6	1	0	0
ENSP00000316426	912	926	15	0.9333	0.2	0	0.0667
ENSP00000225426	2	16	15	0	0	0.6667	0.4667
ENSP00000269554	402	416	15	0	0	0.8667	0.7333
ENSP00000300651	527	671	145	0.9103	0.3379	0	0.2483
ENSP00000300647	597	611	15	1	0.7333	0	0.4667
ENSP00000300647	1362	1396	35	0.9429	0.3429	0	0.3143
ENSP00000341926	273	293	21	0	0	0.8571	0.619
ENSP00000377684	27	41	15	0	0	1	0.3333
ENSP00000264637	372	466	95	0.6632	0.0632	0	0.4105
ENSP00000264645	552	571	20	0.95	0	0	0.1
ENSP00000320924	232	246	15	1	0.3333	0	0
ENSP00000269593	52	66	15	0	0.8667	1	0.3333
ENSP00000355261	322	336	15	0	0	0	0.3333
ENSP00000264640	2	26	25	0	0	1	0.92
ENSP00000347823	157	181	25	0	0	1	0.56
ENSP00000357244	87	101	15	0.0667	0	1	0.4
ENSP00000347649	52	76	25	0	0.6	0	0.88
ENSP00000314608	112	126	15	0	0	1	0.6667
ENSP00000225916	2	16	15	1	0.8667	0	0
ENSP00000225916	22	46	25	1	1	0	0
ENSP00000225916	72	86	15	1	0.9333	0.0667	0.2667
ENSP00000225916	97	111	15	0.2667	0	1	0.6667
ENSP00000264661	207	221	15	0	0	0	0.8
ENSP00000293330	92	106	15	0.2	0	1	0.2667
ENSP00000246912	7	26	20	1	0.4	0	0.1
ENSP00000293349	527	541	15	0.8	1	0	0.6
ENSP00000293349	757	771	15	1	0.4	0	0
ENSP00000332504	232	246	15	0	0.8667	1	0.8
ENSP00000253794	92	111	20	0	0	1	0.5
ENSP00000246914	32	46	15	1	0.8	0	0.2
ENSP00000246914	1212	1241	30	1	0	0	0.2333
ENSP00000355231	17	31	15	0	0	0	0.3333
ENSP00000293362	197	211	15	0	0	1	0.6667
ENSP00000350283	277	301	25	0.8	0	0	0.24
ENSP00000350672	12	36	25	0	0.92	0	0.88
ENSP00000255039	37	66	30	0	0	0.7667	0.3667
ENSP00000323901	37	56	20	0	0	0.9	0.15
ENSP00000323901	522	541	20	0	0	1	0.8
ENSP00000200557	182	201	20	0	0	0.4	0.15
ENSP00000333193	267	301	35	0.0286	0	0	0.2
ENSP00000258960	2	26	25	1	0	0	0.04
ENSP00000328773	7	26	20	1	0	0	0.4
ENSP00000340820	610	634	25	1	0	1	0.4
ENSP00000262419	2	41	40	0.525	0.55	0	0.4
ENSP00000262419	157	176	20	1	0.6	0	0.25
ENSP00000262419	197	236	40	1	0	0	0.075
ENSP00000290158	47	66	20	0	0	1	0.45
ENSP00000290158	832	846	15	0	0	0	0.8
ENSP00000177694	87	101	15	1	0	0	0
ENSP00000340799	2	16	15	0.7333	0	0	0.2
ENSP00000340799	42	56	15	1	0	0	0
ENSP00000365931	597	611	15	0	0	0.7333	0.6
ENSP00000354855	21	40	20	0	0	0	0.95
ENSP00000354855	81	105	25	0	0	0	0.4
ENSP00000354855	151	175	25	1	0	0	0.12
ENSP00000331741	2	81	80	0.675	0.1375	0	0.2375
ENSP00000308252	357	371	15	1	0	0	0
ENSP00000308252	407	431	25	1	0	0	0
ENSP00000328928	72	86	15	1	1	0	0
ENSP00000239151	2	61	60	0.1167	0.2667	0	0.15
ENSP00000225648	2	26	25	0	0	0	0.2
ENSP00000239165	2	31	30	0	0	0	0.2
ENSP00000239165	107	131	25	0.4	0	0	0.4
ENSP00000290295	132	146	15	0	0	0	0.0667
ENSP00000258947	97	111	15	0	0	1	0.4
ENSP00000377001	2	16	15	0.6667	0	0	0
ENSP00000240364	72	86	15	0.5333	0	0	0.1333
ENSP00000259021	222	251	30	1	0	0	0.4667
ENSP00000007722	302	316	15	0	0	0.6667	0.6667
ENSP00000329144	137	151	15	1	1	0	0
ENSP00000225972	2	26	25	0.32	0	0	0
ENSP00000271526	182	201	20	1	0	0	0.15
ENSP00000240304	407	431	25	1	0	0	0.12
ENSP00000268957	37	56	20	0	0.15	1	0.2
ENSP00000268957	277	301	25	0.84	0	0	0
ENSP00000268957	322	341	20	0.35	0	0	0.1
ENSP00000299335	232	251	20	0	0	1	0.4
ENSP00000328181	112	126	15	0.0667	0	1	0.0667
ENSP00000284061	62	76	15	0	0	1	0.2667
ENSP00000384712	297	311	15	0.7333	0	0	0.6
ENSP00000258962	142	176	35	0.2857	0	1	0.6571
ENSP00000258962	187	246	60	1	0.85	0	0.15
ENSP00000240343	72	86	15	0	0	1	1
ENSP00000385328	2	21	20	0	0.6	0	0.8
ENSP00000385328	232	251	20	0	0	0	0.95
ENSP00000312411	507	521	15	1	0.6667	0	0
ENSP00000300917	477	491	15	0	0	1	0.6667
ENSP00000251241	2	16	15	1	0	0	0.0667
ENSP00000251241	427	441	15	0	0	0	0.7333
ENSP00000262291	82	96	15	0	0	0	0.9333
ENSP00000225577	2	16	15	0.6667	0	0	0
ENSP00000304670	177	191	15	0	0	0	0.8667
ENSP00000184956	57	71	15	0	0	0	0.3333
ENSP00000240328	67	86	20	0.5	0.05	0	0.3
ENSP00000357177	1377	1391	15	1	0.9333	0	0
ENSP00000333268	242	256	15	0.9333	0	0	0
ENSP00000258991	2	16	15	1	0	0	0
ENSP00000258991	312	331	20	0.95	0.6	0	0.15
ENSP00000258991	512	526	15	0	0	0	0.6
ENSP00000225792	547	561	15	0.4667	0	0.7333	0.3333
ENSP00000262138	37	51	15	0	0	1	0.0667
ENSP00000307208	2362	2376	15	1	1	0	0.2
ENSP00000307208	2387	2421	35	1	0.7429	0	0.2571
ENSP00000307208	2427	2451	25	0.08	1	0	0.76
ENSP00000307208	2492	2506	15	0	0.6667	0	1
ENSP00000307208	2572	2586	15	0.1333	0.2	0	0.8667
ENSP00000262139	432	446	15	0.6	0	0	0.2667
ENSP00000350198	72	86	15	0	0	1	0.8667
ENSP00000350198	342	366	25	0.48	0	0	0.48
ENSP00000293195	252	266	15	0	0	0	0
ENSP00000328090	7	21	15	0.6	1	0	0.5333
ENSP00000301587	2	21	20	0	0	1	0.55
ENSP00000200181	1377	1406	30	0.3667	0	0	0.1667
ENSP00000364334	22	46	25	0.16	0.24	1	0.4
ENSP00000254810	112	136	25	0	0	0.84	0.6
ENSP00000387085	51	75	25	0	0.4	0	0.76
ENSP00000293217	7	21	15	0.6	0	0	0.4
ENSP00000293217	92	111	20	0	0	0	0.3
ENSP00000293230	12	36	25	0.32	0.52	0.56	0.92
ENSP00000156626	297	311	15	0	0	0.6	0.3333
ENSP00000376276	42	56	15	0.2	0	1	0.2
ENSP00000337240	2	16	15	0	0	0.2	0.8
ENSP00000330341	2	16	15	0	0	0	0
ENSP00000262768	22	41	20	0	0	0.85	0.05
ENSP00000269349	2	16	15	0.6	0.8	0	0.5333
ENSP00000269349	32	46	15	0.0667	0	0	0.2
ENSP00000331514	177	191	15	0	0	1	0.6
ENSP00000335677	182	196	15	0.4667	0	0	0.4667
ENSP00000376139	207	221	15	0	0	0.2	0.6
ENSP00000352892	527	541	15	0.1333	0	0	0.2667
ENSP00000383078	162	176	15	0	0	0	0.6
ENSP00000217652	2	16	15	1	0.6667	0	0
ENSP00000237500	2	16	15	0.9333	0.6667	0	0
ENSP00000327959	232	251	20	0.65	0	0	0.3
ENSP00000327959	357	371	15	1	0	0	0
ENSP00000349503	2	26	25	0	0	0.04	0.56
ENSP00000331418	1027	1041	15	0	0	1	1
ENSP00000305027	668	682	15	0.4667	0	0	0.9333
ENSP00000262126	2	21	20	1	0	0	0
ENSP00000262126	82	101	20	1	0	0	0.4
ENSP00000269143	152	166	15	0	0	0.9333	0.9333
ENSP00000323635	137	156	20	0	0	1	0.9
ENSP00000382697	2	26	25	0	0	0	0.4
ENSP00000341874	277	326	50	0	0	1	0.48
ENSP00000320291	747	761	15	0	0	1	0.3333
ENSP00000314831	2	16	15	0.7333	0	0	0
ENSP00000314831	72	101	30	0	0	1	0.5
ENSP00000257198	2	21	20	0	0.3	0	0.55
ENSP00000352785	1016	1030	15	0	0	0	0.5333
ENSP00000306459	357	376	20	0	0	0.8	0.55
ENSP00000283351	217	231	15	0	0	1	0.4667
ENSP00000283351	917	931	15	0	0	0	0.6
ENSP00000382165	502	521	20	1	0.35	0	0.15
ENSP00000382124	17	31	15	0	0	0	0.6
ENSP00000382124	42	56	15	0	0	0	0.3333
ENSP00000300249	2	36	35	0.5143	0	0	0.1714
ENSP00000300249	47	61	15	0	0	0.1333	0.5333
ENSP00000382011	87	101	15	0	0	1	0.9333
ENSP00000376574	7	26	20	0	0	0	1
ENSP00000349955	7	21	15	0	0	0	0.8
ENSP00000282030	142	171	30	1	0	0	0.0333
ENSP00000282030	182	206	25	1	0	0	0.24
ENSP00000282030	687	711	25	1	0	0	0
ENSP00000282030	747	766	20	1	0	0	0.05
ENSP00000282030	877	891	15	0.7333	0.6667	0	0.4
ENSP00000282030	937	951	15	0	0	0	0.2
ENSP00000282030	962	1011	50	0.24	0	0	0.08
ENSP00000255226	202	216	15	0	0	1	0.8
ENSP00000282041	1802	1816	15	0	0	0	0.4
ENSP00000372459	337	351	15	1	0	0	0.6
ENSP00000372459	579	598	20	0	0	0	0.6
ENSP00000262158	2	16	15	0.6	0	0	0.6667
ENSP00000262158	162	186	25	0	0	1	0.36
ENSP00000269468	367	381	15	0	0	0.7333	0.8
ENSP00000285106	97	111	15	1	0	0	0
ENSP00000285106	127	146	20	1	0	0	0.2
ENSP00000304146	2	26	25	0	0	0	0.76
ENSP00000304146	527	551	25	0.24	0	0.88	0.28
ENSP00000256429	2	16	15	1	0.1333	0	0
ENSP00000256429	47	76	30	1	0.9667	0	0.0667
ENSP00000256429	92	121	30	1	1	0	0
ENSP00000217515	7	21	15	0.2	0	0.5333	0
ENSP00000254442	667	686	20	0	0	0	0.35
ENSP00000254442	722	736	15	0.2667	0	0	0.0667
ENSP00000254442	1372	1386	15	0	0	0	0.3333
ENSP00000283684	962	976	15	0	0	0	0.6667
ENSP00000381305	312	351	40	0	0	0	0.4
ENSP00000262716	535	584	50	0.04	0.18	0	0.54
ENSP00000262716	830	869	40	0	0	0	0.375
ENSP00000262716	885	909	25	0	0	0	0.28
ENSP00000357060	362	381	20	0	0	0.8	0.55
ENSP00000299766	192	206	15	0	0	1	1
ENSP00000262717	2	16	15	0	0	0	0.1333
ENSP00000316628	92	106	15	0	0	0	0.4
ENSP00000341584	137	156	20	0	0	1	0.75
ENSP00000262150	127	156	30	0.1333	0	0.5	0.2667
ENSP00000310565	2	21	20	0	0.45	0	0.7
ENSP00000310565	1157	1176	20	0	0	1	0.45
ENSP00000313088	97	116	20	0	0	1	0.35
ENSP00000323584	917	936	20	0	0	0	0.45
ENSP00000299466	1032	1051	20	0.4	0	0	0.05
ENSP00000304500	172	186	15	0	0	0	0.7333
ENSP00000343144	232	251	20	0.3	0	0.45	0.65
ENSP00000252288	22	36	15	0	0.6	0	0.4667
ENSP00000255641	2	16	15	1	0.7333	0	0.1333
ENSP00000255608	87	101	15	0.0667	0.4667	0	0.6
ENSP00000255608	117	131	15	0	0	1	0.4667
ENSP00000250896	2	16	15	0.6	0	0	0.2667
ENSP00000304467	337	361	25	0	0	1	0.72
ENSP00000078429	27	41	15	0.1333	0	1	0.9333
ENSP00000262958	347	361	15	0	0	1	0.8
ENSP00000292672	402	416	15	0	0	1	0.4667
ENSP00000301264	62	76	15	0	0.2	1	0.6667
ENSP00000262971	242	256	15	0	0	0	0.4667
ENSP00000337332	2	16	15	0	0	0	0
ENSP00000221852	17	31	15	1	0.4667	0	0.3333
ENSP00000269856	72	86	15	0.0667	0	0	0.2
ENSP00000347106	630	679	50	0.68	0	1	0.34
ENSP00000349204	2	16	15	0	0.8667	0	0.5333
ENSP00000221480	2	16	15	0	0.6667	0.7333	0.6
ENSP00000221573	37	51	15	1	0	1	0.5333
ENSP00000376027	272	286	15	0	0	0	0.6
ENSP00000313226	57	71	15	0	0	1	0.2667
ENSP00000385269	282	301	20	0	0	1	0.65
ENSP00000385269	307	326	20	0	0	0.4	0.45
ENSP00000325376	222	236	15	0	0	1	0.8
ENSP00000377493	2	16	15	0	0	0	0.7333
ENSP00000341497	257	276	20	0	0	0.75	0.5
ENSP00000253109	92	121	30	0.3333	0.1667	0	0.6667
ENSP00000253107	17	31	15	0.2	0	0	0.6667
ENSP00000352516	77	96	20	0.4	0	1	0.45
ENSP00000214869	2	16	15	0	0.8667	0	0.6667
ENSP00000325690	542	556	15	0.3333	0	0	0.1333
ENSP00000347276	617	631	15	0	0	0	1
ENSP00000293771	2	16	15	1	1	0	0.5333
ENSP00000210060	7	21	15	0.2667	0	0	0.4667
ENSP00000292431	392	406	15	0	0	0.6667	0.8
ENSP00000309591	312	326	15	0	0	0	0
ENSP00000383690	60	74	15	0	0	1	0.5333
ENSP00000263377	7	21	15	1	0	0	0.0667
ENSP00000263377	27	51	25	1	1	0	0.16
ENSP00000263377	112	126	15	0	0	1	0.6667
ENSP00000263377	192	211	20	1	0.75	0	0
ENSP00000269881	137	151	15	0	0	1	0.5333
ENSP00000263390	567	581	15	0	0	0	0.4
ENSP00000187762	7	21	15	0	0.6	0	0.4667
ENSP00000356919	57	71	15	0.0667	0.6667	0	0
ENSP00000262801	2	16	15	1	0.2667	0	0.4
ENSP00000315147	42	56	15	0	0	0	0.3333
ENSP00000337926	382	421	40	0	0	0	0.475
ENSP00000252575	312	326	15	0.3333	0	1	0.1333
ENSP00000251203	107	146	40	0.425	0.225	1	0.55
ENSP00000203556	642	666	25	0.6	0.52	1	0.44
ENSP00000299373	132	156	25	0.32	0	0.36	0.24
ENSP00000376097	132	151	20	0	0	0.8	0.9
ENSP00000376090	807	826	20	0.75	0.9	0	0.3
ENSP00000376090	852	871	20	1	0.85	0	0.2
ENSP00000376090	1007	1026	20	0.65	0	0	0.45
ENSP00000376090	1037	1051	15	0	0	0.7333	0.4
ENSP00000344937	347	361	15	0	0.2667	1	1
ENSP00000023064	177	191	15	0	0.6667	1	1
ENSP00000170564	342	356	15	0	0	0	0.2667
ENSP00000284006	2	16	15	1	0.5333	0	0.0667
ENSP00000348594	42	61	20	0.75	0.6	1	0.1
ENSP00000348594	202	226	25	1	0	0	0.12
ENSP00000299505	2	26	25	0.04	0	0	0.44
ENSP00000299505	782	796	15	0	1	0	0.4667
ENSP00000222305	47	61	15	0.5333	0	0	0.8
ENSP00000328230	27	41	15	0	0.9333	0.6667	0.7333
ENSP00000341455	252	266	15	0	0	1	0.4667
ENSP00000246549	92	106	15	0	0	1	0.7333
ENSP00000339458	182	201	20	1	0	0	0.75
ENSP00000340226	32	46	15	0	0	0.8	0.6667
ENSP00000246529	392	411	20	1	0.4	0	0
ENSP00000325864	7	41	35	0.2286	0	0	0.3714
ENSP00000346827	22	46	25	0.08	0	0	0.28
ENSP00000263372	17	31	15	0	0.8	0	0.8
ENSP00000334940	52	101	50	1	0.44	0	0.14
ENSP00000252699	2	16	15	0.2667	0.2	0	0.2
ENSP00000252699	37	51	15	0.0667	0	0	0.4
ENSP00000356853	137	151	15	0	0	1	1
ENSP00000312789	577	601	25	1	0.96	0	0.36
ENSP00000253055	2	16	15	0.8	0	0	0.2
ENSP00000311760	2	26	25	0.88	0.56	0	0.2
ENSP00000350556	379	393	15	0.8667	0	0	0.7333
ENSP00000263373	2387	2401	15	1	1	0	0
ENSP00000263370	22	56	35	1	0.8571	0	0.0571
ENSP00000307080	2	16	15	1	0.9333	0	0.1333
ENSP00000301173	27	46	20	0	0.85	0.7	0.15
ENSP00000263367	507	521	15	0.1333	0	0	0.2667
ENSP00000269980	147	161	15	0	0	1	0.4
ENSP00000356836	69	83	15	0.4667	0	0	0.5333
ENSP00000160740	92	106	15	1	0.2667	0	0
ENSP00000160740	832	851	20	0.85	0.65	0	0.1
ENSP00000359540	74	88	15	0.3333	0	0	0.6
ENSP00000262887	2	16	15	0	0	1	0.4667
ENSP00000262888	92	111	20	0	0	1	0.75
ENSP00000270281	67	81	15	0.3333	0.4	1	0.5333
ENSP00000245919	247	321	75	0.5867	0.1467	0	0.1867
ENSP00000245923	387	406	20	0	0.1	1	0.85
ENSP00000245925	297	311	15	0	0	1	0.5333
ENSP00000316842	2	21	20	1	0.85	0	0.25
ENSP00000316842	37	61	25	0.96	1	0	0.64
ENSP00000366979	28	43	16	1	1	0	0
ENSP00000263257	457	481	25	0.12	0	0.68	0.88
ENSP00000012443	2	16	15	0.8667	0	0	0
ENSP00000012443	57	71	15	0	0	0.3333	0.3333
ENSP00000326570	242	266	25	0	0.4	0	0.76
ENSP00000253047	12	31	20	0.15	0.9	0	0.45
ENSP00000331907	297	321	25	0	0	0.76	0.72
ENSP00000263354	7	26	20	0	0.75	0	0.75
ENSP00000354558	382	396	15	0	0	0	0.6667
ENSP00000293261	52	66	15	0	0	0	0.4667
ENSP00000329471	2	26	25	0	0.68	0	0.8
ENSP00000263269	2	41	40	0.425	0.75	0	0.3
ENSP00000222122	12	31	20	1	1	0	0.3
ENSP00000084798	7	21	15	0	0.6667	0	0.7333
ENSP00000084798	32	46	15	0	0	0	0
ENSP00000324175	200	214	15	1	0.5333	0.1333	0.2
ENSP00000221444	7	36	30	0	0.2667	0.7	0.4667
ENSP00000335614	7	41	35	0.6571	0.1714	0	0.4286
ENSP00000310701	2	16	15	1	0.4	0	0
ENSP00000270631	67	91	25	0	0.72	0	0.92
ENSP00000221485	117	131	15	0	0	1	0.8667
ENSP00000204637	117	136	20	0	0	1	0.85
ENSP00000270645	107	141	35	0.1714	0	0	0.4571
ENSP00000246792	2	51	50	0.64	0.56	0.42	0.28
ENSP00000375711	232	246	15	0.8667	0	0	0.8
ENSP00000307356	2	56	55	0.2364	0.4545	0	0.2545
ENSP00000303282	17	36	20	1	1	0.1	0
ENSP00000303282	42	86	45	1	0.6667	0	0.0667
ENSP00000324804	172	191	20	0	0	1	0.75
ENSP00000366006	262	276	15	0	0	1	1
ENSP00000301249	183	197	15	0	0	0	0.5333
ENSP00000255613	57	81	25	0	0	0	0.76
ENSP00000221665	457	471	15	0	0	0.1333	0.2
ENSP00000301073	2	31	30	1	0.8333	0	0
ENSP00000320050	2	31	30	1	1	0	0
ENSP00000307863	2	16	15	1	0	0	0.8
ENSP00000196482	347	361	15	0.0667	0	1	0.1333
ENSP00000253023	117	136	20	0	0	1	0.75
ENSP00000354920	142	181	40	0	0	0.4	0.75
ENSP00000354920	217	231	15	0	0	0	0.8
ENSP00000347646	112	126	15	1	1	0	0
ENSP00000246077	377	391	15	0	0	0	0.0667
ENSP00000371400	2	16	15	0.4	0	0	0.2667
ENSP00000371400	252	271	20	0	0	1	0.45
ENSP00000246104	167	181	15	0.8	0	0.7333	0.3333
ENSP00000327704	257	271	15	0.8667	0.5333	0	0
ENSP00000371318	17	36	20	1	0	0	0.2
ENSP00000370891	17	31	15	1	0	0	0
ENSP00000370891	342	361	20	0.15	0	1	0.3
ENSP00000370891	367	401	35	0.1714	0	0.6857	0.5429
ENSP00000382771	72	86	15	0	0	1	0.2
ENSP00000262919	317	331	15	0	0	0	0.0667
ENSP00000313377	77	91	15	0.9333	0	0	0.0667
ENSP00000313377	272	291	20	0	0	1	0.35
ENSP00000313377	302	326	25	0	0	1	0.48
ENSP00000307252	2	26	25	0.68	0	0	0.36
ENSP00000368361	72	96	25	0	0	1	0.96
ENSP00000217270	337	351	15	0	0	0	0.8667
ENSP00000368305	477	491	15	0	0	1	1
ENSP00000368140	152	191	40	0	0	1	0.625
ENSP00000368104	2	21	20	0	0.7	0	0.6
ENSP00000368104	162	176	15	0	0	1	0.5333
ENSP00000334105	632	646	15	0	0	1	0.3333
ENSP00000246070	42	76	35	0	0	1	0.6
ENSP00000246070	97	111	15	0	0	1	0.3333
ENSP00000367679	347	371	25	1	0.56	0	0
ENSP00000254958	62	81	20	0	0	1	0.45
ENSP00000254958	602	621	20	0	0	0	0.25
ENSP00000384545	2	31	30	0.2333	0.3	0	0.5333
ENSP00000384545	52	66	15	0.2	0	0	0.5333
ENSP00000384545	72	86	15	0.9333	0	0	0.5333
ENSP00000338624	192	211	20	0	0	1	0.8
ENSP00000339912	57	71	15	0	0	0	0.3333
ENSP00000339912	277	296	20	0	0	0.6	0.1
ENSP00000262545	7	51	45	0	0	0	0.6667
ENSP00000367044	1255	1269	15	1	0	0	0.5333
ENSP00000278780	12	26	15	0.8	0	0	0.2667
ENSP00000385573	22	36	15	1	0	0	0.4667
ENSP00000385573	337	351	15	0.0667	0	1	0.2667
ENSP00000366396	2	16	15	0	0	1	0.5333
ENSP00000366347	252	271	20	0.15	0	0	0.15
ENSP00000366225	37	51	15	0	0	0	1
ENSP00000365725	2	16	15	0.1333	0.0667	0	0.3333
ENSP00000302441	37	56	20	0	0	1	0.8
ENSP00000281881	525	539	15	0	0	0	0.3333
ENSP00000246229	12	41	30	0.3667	0	0	0.4667
ENSP00000246229	332	361	30	0.1	0	0	0.1667
ENSP00000246229	377	396	20	0.55	1	0	0.65
ENSP00000364864	377	416	40	1	0.775	0	0.35
ENSP00000354481	637	651	15	0	0	0	0.9333
ENSP00000351836	612	671	60	0.95	0.4667	0	0.2833
ENSP00000351836	682	701	20	1	0	0	0.15
ENSP00000352704	2	16	15	1	0	0	0
ENSP00000352704	307	331	25	0.56	0	0	0.24
ENSP00000263528	2	16	15	0.8667	0	0	0
ENSP00000263528	172	186	15	0.2667	0	1	0.4
ENSP00000263528	422	441	20	0	0	0	0.85
ENSP00000263528	927	946	20	1	0	1	0.2
ENSP00000263528	1247	1266	20	0.9	0	0	0.15
ENSP00000217381	192	206	15	1	0	0	0
ENSP00000352622	42	56	15	1	0.1333	0	0.4
ENSP00000385002	72	86	15	1	0.7333	0	0
ENSP00000364119	77	91	15	0.0667	0.6	0	0.6
ENSP00000363942	62	76	15	0.6	0.2667	0	0.2
ENSP00000363929	417	436	20	1	0	0	0
ENSP00000363929	447	466	20	1	0	0	0.25
ENSP00000363929	477	491	15	1	0	0	0.2
ENSP00000363929	732	746	15	1	0	0	0.0667
ENSP00000363929	1527	1541	15	1	0	0	0.1333
ENSP00000252015	542	556	15	0	0	1	0.6
ENSP00000356607	177	196	20	0	0	1	0.55
ENSP00000363492	2	16	15	0	0.7333	0	0.8
ENSP00000363492	92	106	15	1	0.8667	0	0
ENSP00000363492	177	191	15	1	0	1	0.3333
ENSP00000349970	12	26	15	0	0	0	0.4
ENSP00000363391	42	56	15	1	1	0	0
ENSP00000363228	2	51	50	0	0	0	0.52
ENSP00000363228	577	591	15	0.2667	0	1	0.5333
ENSP00000363124	537	551	15	1	1	0	0.4667
ENSP00000363014	552	566	15	1	0.8	0	0.3333
ENSP00000363014	750	769	20	0.95	0	1	0.35
ENSP00000363014	870	889	20	0.55	0	1	0.5
ENSP00000341213	2	16	15	0.8	0	0	0.0667
ENSP00000353950	67	81	15	1	0	0	0
ENSP00000380326	2	16	15	0	0	1	0.6
ENSP00000062104	27	51	25	0	0	0	0.56
ENSP00000362560	2	31	30	0.0667	0	0	0.5667
ENSP00000362547	137	151	15	0	0	0	0.4
ENSP00000362532	222	241	20	0	0	0	0.95
ENSP00000262879	437	451	15	0.1333	0	0	0.8
ENSP00000243903	432	446	15	0	0	1	0.7333
ENSP00000362410	2	16	15	0.8667	0	0	0.0667
ENSP00000362410	272	286	15	0.8	0	1	1
ENSP00000354522	154	168	15	1	1	0	0.4667
ENSP00000354522	224	238	15	1	0.9333	0	0.3333
ENSP00000354522	249	263	15	1	1	0	0
ENSP00000244007	32	46	15	0	0	0.4667	0.4
ENSP00000312222	182	196	15	0.2	0.8	0	0.6667
ENSP00000341782	297	311	15	0	0	0.8	0.9333
ENSP00000354891	2	16	15	0	0	0	0.6667
ENSP00000361952	137	151	15	0	0.4667	0	0.6667
ENSP00000361812	97	116	20	0	0	1	0.65
ENSP00000279036	512	526	15	0	0	1	0.1333
ENSP00000255152	17	41	25	0	0	0	0.64
ENSP00000361601	387	401	15	0	0	1	0.5333
ENSP00000243964	297	311	15	0	0	0	0.4
ENSP00000290231	492	506	15	1	0	0	0
ENSP00000361336	737	761	25	0.36	0	1	0.48
ENSP00000361336	772	786	15	0.2667	0.4667	1	0.3333
ENSP00000361186	57	81	25	0.12	0	0.4	0.44
ENSP00000262975	817	841	25	1	0.12	0	0.36
ENSP00000262975	987	1001	15	0.2	0	0	1
ENSP00000258301	167	186	20	0	0.45	0.95	0.7
ENSP00000360985	517	531	15	0	0	0.9333	0.5333
ENSP00000360985	1652	1666	15	0	0	0	0.7333
ENSP00000262982	542	571	30	0	0	1	0.6333
ENSP00000360922	462	486	25	0.64	0	0	0.24
ENSP00000360806	2	31	30	0.6667	0	0	0.3
ENSP00000356552	212	226	15	0	0	0.6	0.4667
ENSP00000354966	362	386	25	0	0	1	0.6
ENSP00000354966	457	471	15	0	0.6	1	0.6
ENSP00000342905	82	101	20	0	0	0	0.6
ENSP00000342905	112	171	60	0.1667	0.2	0	0.3333
ENSP00000342905	1007	1046	40	0.875	0.275	0	0.425
ENSP00000360640	272	286	15	0	0	0	0.5333
ENSP00000360626	82	101	20	0	0	1	0.15
ENSP00000379330	87	116	30	0.8333	0	0	0.3
ENSP00000379330	157	281	125	0.752	0.448	0	0.056
ENSP00000379330	872	886	15	1	0	0	0.3333
ENSP00000217086	382	396	15	0	0	1	0.1333
ENSP00000360495	77	91	15	1	0.6667	0	0.0667
ENSP00000360495	97	111	15	1	0	0	0.2
ENSP00000201031	147	161	15	0.0667	1	0	0.2667
ENSP00000360340	2	21	20	0	0	0	0.55
ENSP00000360054	2	31	30	1	0.2333	0	0.1667
ENSP00000258302	182	196	15	0	0.5333	0.5333	0.9333
ENSP00000359576	37	51	15	0.5333	0	1	0.2667
ENSP00000217159	577	596	20	0	0.9	1	0.7
ENSP00000258341	67	96	30	0	0.0667	1	0.1667
ENSP00000359285	287	306	20	0	0.35	1	0.7
ENSP00000264144	1027	1046	20	0	0.05	0	0.6
ENSP00000356509	650	674	25	1	0	0	0.08
ENSP00000341815	2	26	25	1	0	0	0
ENSP00000383063	2	36	35	0.3143	0	0	0.4286
ENSP00000383063	117	141	25	0.04	0	0	0.48
ENSP00000344609	281	295	15	0.3333	0	0	0
ENSP00000352918	2	16	15	0	0	0.4667	0.1333
ENSP00000346886	82	101	20	0	0	1	0.55
ENSP00000284981	87	101	15	0	0	1	0.6667
ENSP00000284987	27	41	15	1	0.7333	0	0.2667
ENSP00000284987	372	391	20	0	0	1	0
ENSP00000310622	42	56	15	0	0	1	0.6667
ENSP00000334808	322	341	20	0.2	0	1	0.8
ENSP00000343212	82	96	15	0	0	0	0.2667
ENSP00000286800	122	136	15	0	0	0.4	0.6
ENSP00000303192	627	641	15	1	0.4667	0	0.0667
ENSP00000286827	167	201	35	0.3714	0.3429	0	0.2857
ENSP00000286827	212	226	15	1	0	0	0.1333
ENSP00000286827	302	321	20	1	0	0	0.05
ENSP00000300255	82	101	20	0	0	1	0.4
ENSP00000290155	17	41	25	0.04	0	0	0.68
ENSP00000371794	77	91	15	1	1	0	0.2667
ENSP00000371261	477	491	15	0	0	1	0.2
ENSP00000348984	2	16	15	0	0	0	0.8
ENSP00000348984	367	421	55	1	0	0	0.2182
ENSP00000348984	437	451	15	1	0	0	0
ENSP00000348984	507	531	25	1	0	0	0.2
ENSP00000348984	637	701	65	0.6308	0	0	0.5538
ENSP00000348984	707	721	15	0.8	0	0	0.2
ENSP00000318147	420	434	15	0	0	1	0.9333
ENSP00000318147	585	609	25	0	0	0	0.64
ENSP00000290354	32	71	40	0	0	1	0.625
ENSP00000382104	2057	2086	30	0	0	0	0.6
ENSP00000290399	352	366	15	0.6	0	0.6	0.6
ENSP00000333293	22	46	25	0	0	0.52	0.44
ENSP00000330753	2257	2281	25	0.92	0.24	0	0.56
ENSP00000332513	52	66	15	0	0	0.2	0.4
ENSP00000269844	2	31	30	1	0	0	0.1333
ENSP00000308759	722	741	20	0	0	0	0.75
ENSP00000291574	127	141	15	0	0	0	0.4
ENSP00000291574	167	186	20	0	0	0	0.55
ENSP00000291582	527	541	15	0	0	0	0.6
ENSP00000365770	658	672	15	0	0	0	0.3333
ENSP00000356432	2	31	30	0	0	0	0.7667
ENSP00000356432	37	51	15	0	0	0	0.2
ENSP00000356432	207	231	25	0	0	0	0.32
ENSP00000356432	747	766	20	0	0	0	0.25
ENSP00000329318	237	256	20	0	0.45	0	0.55
ENSP00000318883	52	66	15	0	0	0	0.9333
ENSP00000333326	427	446	20	0.55	0.3	0	0.35
ENSP00000086933	12	26	15	0	0.3333	0	0.3333
ENSP00000263208	952	971	20	0	0	0.55	0.6
ENSP00000385240	52	66	15	0	0	1	0.7333
ENSP00000331791	422	436	15	0.4	0	0	0.2
ENSP00000331313	142	166	25	0	0	0	0.36
ENSP00000263209	2	21	20	1	0	0	0.25
ENSP00000263209	27	141	115	0.4957	0	0	0.2261
ENSP00000263209	152	226	75	0.4133	0.16	0	0.2533
ENSP00000344259	22	36	15	0	0	1	0.2
ENSP00000344259	122	136	15	0.2667	0	1	1
ENSP00000215832	252	276	25	0	0	1	0.48
ENSP00000248996	177	191	15	0	0	1	0.4667
ENSP00000356405	2	16	15	0	0	0	0.5333
ENSP00000263119	1547	1581	35	0	0	0	0.3429
ENSP00000356404	357	401	45	0	0	0.0222	0.4889
ENSP00000215906	143	157	15	0	0	0	0.3333
ENSP00000215906	238	257	20	0	0	1	0.45
ENSP00000294725	197	211	15	0	0	0.3333	1
ENSP00000294725	702	726	25	0	0	0	0.56
ENSP00000294725	1042	1056	15	0.8667	0	0	1
ENSP00000249064	212	226	15	0.8	0	0	0.1333
ENSP00000311997	2	21	20	0	0	0	0.1
ENSP00000311997	127	141	15	0.8	0	1	0.9333
ENSP00000311997	257	271	15	0.2667	0.0667	1	0.6667
ENSP00000384651	487	501	15	0	0	0	0.5333
ENSP00000384651	1182	1196	15	0	0	0	0.0667
ENSP00000384996	2	16	15	1	0	0	0
ENSP00000215793	2	21	20	1	1	0	0
ENSP00000356382	217	231	15	0	0	1	0.2667
ENSP00000351593	412	426	15	1	0	0	0
ENSP00000351593	527	541	15	1	0	0	0.2
ENSP00000320508	122	136	15	0.1333	1	0	0.2667
ENSP00000248975	197	221	25	0	0	1	0.6
ENSP00000248975	227	241	15	0.5333	0	1	0.4
ENSP00000347088	712	731	20	0	0	0	0.6
ENSP00000380362	497	521	25	0	0	1	0.64
ENSP00000337969	7	21	15	0	0	0	0.2
ENSP00000344504	142	161	20	1	1	0	0.5
ENSP00000249041	147	161	15	0	0.4	1	0.5333
ENSP00000215941	2	16	15	1	0	0	0
ENSP00000354130	237	256	20	1	0.4	0	0.1
ENSP00000354130	397	411	15	0.9333	0	0	0
ENSP00000216024	322	336	15	0.5333	0	1	0.3333
ENSP00000216039	177	191	15	0	0.6	0.0667	0.5333
ENSP00000216044	2	21	20	1	0	0	0.15
ENSP00000216083	2	21	20	0	0.3	0.45	0.7
ENSP00000216133	127	141	15	0.6	0	0	0
ENSP00000216133	157	176	20	1	0	0	0.15
ENSP00000330382	2	21	20	0	0	0.05	0.75
ENSP00000332287	172	186	15	0	0	0	0.1333
ENSP00000345270	377	391	15	0	0	1	0.2
ENSP00000330432	27	46	20	0.05	0	1	0.85
ENSP00000248929	347	361	15	0	0	0	0.7333
ENSP00000249016	37	51	15	0.3333	0	0	0
ENSP00000263253	42	66	25	0.96	0	0	0.32
ENSP00000263253	2042	2071	30	1	0.6	1	0.6333
ENSP00000263253	2352	2371	20	1	0	0	0.2
ENSP00000263253	2377	2396	20	1	0.3	0	0.05
ENSP00000356331	42	61	20	0.55	0	0	0.4
ENSP00000356331	217	236	20	0.15	0	0	0.1
ENSP00000356331	372	386	15	0	0	1	0.9333
ENSP00000216259	7	21	15	0	0	0	0.7333
ENSP00000294740	97	116	20	0.9	0	0	0.05
ENSP00000294740	222	236	15	1	0.3333	0	0.0667
ENSP00000294740	712	741	30	0.0667	0	0	0.1333
ENSP00000294740	807	851	45	0.6	0	0	0.4667
ENSP00000294740	857	871	15	0.8667	0	0	0.3333
ENSP00000327467	37	61	25	0	0	1	0.2
ENSP00000352463	2	21	20	1	0	0	0.15
ENSP00000352463	1467	1481	15	1	0	0	0
ENSP00000352463	1837	1851	15	0.3333	0.7333	0	0.2667
ENSP00000352463	1897	1911	15	0	0	0	0.4
ENSP00000332565	27	41	15	0	0	0	0.2
ENSP00000216214	102	116	15	0	0	0	0.4667
ENSP00000290846	167	181	15	0	0	1	0.6
ENSP00000379296	1707	1721	15	0	0	0.2	0.8667
ENSP00000385858	457	471	15	0	0	0	1
ENSP00000379183	307	321	15	0	0	0	0.6
ENSP00000336522	852	866	15	0	0	0	0.3333
ENSP00000355052	17	31	15	0	0	0	0.6667
ENSP00000356265	37	51	15	1	0.8	0	0
ENSP00000356265	82	96	15	0.9333	0	0	0.2
ENSP00000356265	132	156	25	1	0	0	0.12
ENSP00000354742	502	516	15	0	0	0	0.6667
ENSP00000341785	227	241	15	0	0	1	0.6667
ENSP00000341785	297	311	15	0	0	1	0.7333
ENSP00000308549	232	246	15	0	1	1	0.9333
ENSP00000343924	2	16	15	0	0.6667	0	0.7333
ENSP00000356188	1151	1165	15	0.1333	0.2	1	0.1333
ENSP00000356169	377	391	15	0	0.8	0	0.1333
ENSP00000356159	2	31	30	1	0	0	0
ENSP00000356155	792	806	15	0.0667	0	0	0.2667
ENSP00000356155	1242	1276	35	0	0	1	0.6571
ENSP00000356143	347	361	15	0.1333	0	0	0.6667
ENSP00000356143	587	601	15	0	0	0	1
ENSP00000330633	167	186	20	0	0	0	0.4
ENSP00000330633	777	791	15	0.0667	0	1	0.4667
ENSP00000356130	227	241	15	0	0	0	0.4
ENSP00000356125	37	56	20	0.55	0.6	0.2	0.55
ENSP00000271764	317	331	15	0	0.8667	0	1
ENSP00000355987	222	236	15	0	0	0	0.5333
ENSP00000355987	457	471	15	0	0	1	0.2
ENSP00000355979	2	21	20	0	0	0	0.6
ENSP00000355968	42	56	15	0	0.6	1	0.9333
ENSP00000355961	582	601	20	0	0	0	0.8
ENSP00000261461	82	96	15	0	0	1	0.5333
ENSP00000261461	112	126	15	0	0	1	0.8667
ENSP00000261461	262	276	15	0	0	1	0.8
ENSP00000355938	147	161	15	0	0	1	0.8667
ENSP00000271776	132	146	15	0	0	0	0.5333
ENSP00000355929	107	121	15	0.2	0	0	0.4667
ENSP00000355927	367	386	20	0	0	0	0.1
ENSP00000355927	887	901	15	0	0	1	0.6667
ENSP00000355923	1047	1061	15	0	0	1	0.6667
ENSP00000355899	137	161	25	0.72	0	1	0.56
ENSP00000355896	37	51	15	0.0667	0	1	0.7333
ENSP00000355870	67	81	15	0.2667	0.7333	0	0.6
ENSP00000355870	92	111	20	0.9	0	0	0
ENSP00000355866	47	91	45	0	0	0	0.4222
ENSP00000355866	227	241	15	0.1333	0	1	0.5333
ENSP00000355827	52	81	30	0.2	0.3	0.5	0.5
ENSP00000281701	27	41	15	0	0	0	0.8667
ENSP00000355825	27	46	20	0	0	1	0.4
ENSP00000355781	122	136	15	0	0	0.7333	0.5333
ENSP00000365147	42	66	25	0.32	0.24	0	0.68
ENSP00000355775	77	91	15	1	0.6	0.3333	0.3333
ENSP00000355772	246	260	15	0.0667	0	0	0.7333
ENSP00000355714	7	21	15	0	0	0.9333	0.6667
ENSP00000355714	167	181	15	0	0	0.6667	0.7333
ENSP00000355656	82	106	25	0.04	0	0.4	0.76
ENSP00000355629	107	121	15	0	0.1333	1	0.8
ENSP00000355629	132	151	20	0	0	0.8	0.8
ENSP00000355623	52	66	15	0.8667	0	0	0.1333
ENSP00000355621	207	221	15	0	0	0	0.7333
ENSP00000355609	232	246	15	1	0.5333	0	0.8667
ENSP00000353564	42	66	25	0.52	0	1	1
ENSP00000355583	182	196	15	0	0	1	0.4667
ENSP00000355580	2	26	25	0	0.16	0	0.52
ENSP00000355568	402	416	15	1	0.5333	0	0.1333
ENSP00000384571	2	16	15	0.0667	0	0.4667	0.5333
ENSP00000264187	12	26	15	0	0.4667	0	0.7333
ENSP00000355551	102	116	15	0	0	0	0.6
ENSP00000255380	2	16	15	0	0	0	0
ENSP00000255380	447	461	15	0	0	1	0.4
ENSP00000255380	522	546	25	0	0	0.92	0.52
ENSP00000355518	97	111	15	0	0	1	0.6667
ENSP00000351539	62	76	15	0	0	1	0.3333
ENSP00000351539	212	306	95	0.5053	0	0	0.2842
ENSP00000364885	377	401	25	0	0	0.8	0.32
ENSP00000302177	27	51	25	0	0	0	0.76
ENSP00000310749	27	41	15	0	0	0	0.5333
ENSP00000295082	217	231	15	0	0	0.4667	0.4667
ENSP00000155926	7	41	35	0.2857	0	0	0.3429
ENSP00000155926	52	66	15	0	0	0	0.7333
ENSP00000155926	297	321	25	0	0	0.48	0.12
ENSP00000281043	52	76	25	0.8	0	1	0.12
ENSP00000323439	167	181	15	0	0	1	0.6667
ENSP00000385968	2	16	15	0	0	0	0
ENSP00000385968	352	366	15	0	0	1	0.5333
ENSP00000272223	202	216	15	0	0	0.9333	0.6
ENSP00000272223	237	266	30	0	0	0.5667	0.5667
ENSP00000175091	12	26	15	0	0	0	0.2
ENSP00000354370	22	41	20	0.85	0	0	0.15
ENSP00000354370	122	171	50	1	0	0	0.06
ENSP00000354370	227	241	15	1	0	0	0.4667
ENSP00000270747	97	111	15	1	0	0	0
ENSP00000270747	337	356	20	0.3	0	0	0.35
ENSP00000233242	2172	2191	20	0	0	0	0.7
ENSP00000370373	67	81	15	0	0	1	0.3333
ENSP00000370373	92	106	15	0	0	0.9333	0.5333
ENSP00000385216	442	456	15	0.7333	0.4	0	0.5333
ENSP00000385216	1392	1441	50	0.64	0.32	0	0.5
ENSP00000260600	177	191	15	0	0.6	0	0.5333
ENSP00000264712	2	16	15	0	0	0.0667	0.6667
ENSP00000264712	682	701	20	0.05	0	0	0.45
ENSP00000306275	37	51	15	0	0.8667	0	1
ENSP00000353249	787	806	20	1	0	0	0
ENSP00000353249	837	851	15	0.8	1	0	0.2
ENSP00000264705	2	26	25	0	0	1	0.32
ENSP00000233535	152	166	15	0	0	1	1
ENSP00000296097	52	66	15	0	0	0.8667	0.4667
ENSP00000296098	2	21	20	0	0	0	0.15
ENSP00000352536	92	111	20	1	0.7	0	0
ENSP00000233575	2	21	20	0.4	0	0.55	0.15
ENSP00000327214	82	96	15	0	0	1	0.5333
ENSP00000318373	107	151	45	0.4444	0.9111	0	0.1111
ENSP00000318373	172	191	20	0	0	0.7	0.25
ENSP00000318373	202	221	20	0	0	0.8	0.05
ENSP00000342778	162	186	25	1	0.52	0	0
ENSP00000342778	252	266	15	1	0.6	0	0.2
ENSP00000260570	762	776	15	0	0	0	0.6667
ENSP00000260570	887	901	15	0	0	0	0.9333
ENSP00000306817	47	61	15	0	0.6	1	0.7333
ENSP00000384533	600	614	15	0.5333	0.4	0	0.4
ENSP00000368691	200	219	20	0	0	1	0.7
ENSP00000295066	77	91	15	0	0	1	0.7333
ENSP00000280527	622	641	20	0	0	1	0.35
ENSP00000263918	27	46	20	0.05	0.95	0	0.75
ENSP00000263918	117	136	20	0.85	0	1	0
ENSP00000368356	17	31	15	0	0	0	0
ENSP00000295373	377	396	20	0	0	1	0.65
ENSP00000295373	502	516	15	0	0	0	0.6
ENSP00000364597	597	611	15	0	0	1	0.2667
ENSP00000384675	127	141	15	0	0	1	1
ENSP00000384675	732	746	15	0	0	0	0.7333
ENSP00000281961	7	21	15	0	0.8	0	0.8667
ENSP00000281961	117	131	15	0	0	0	0.6
ENSP00000260619	347	361	15	0	0	1	0.5333
ENSP00000367987	897	971	75	0	0	0.88	0.7333
ENSP00000304127	242	256	15	0	0	1	0.2667
ENSP00000304127	362	381	20	0	0	1	0.55
ENSP00000364585	102	116	15	0	0	0	0.4
ENSP00000282388	2	16	15	0	0	1	0.7333
ENSP00000282388	282	296	15	0.6	1	0	0
ENSP00000282412	407	431	25	0.76	0.24	0	0.72
ENSP00000367755	262	276	15	0	0	1	0.6
ENSP00000367755	282	296	15	0	0	0	0.8
ENSP00000263736	697	711	15	0	0	0.5333	0.9333
ENSP00000306124	17	31	15	0	0	1	0.3333
ENSP00000306124	692	706	15	0.0667	0.1333	1	0
ENSP00000305133	412	426	15	0	0	1	0.8
ENSP00000327611	2	21	20	0.6	1	0	0
ENSP00000384823	856	875	20	0	0	1	0.45
ENSP00000294954	292	306	15	0	0	0	0.6667
ENSP00000385142	1367	1381	15	0.8	0.6667	0	0.4667
ENSP00000185150	227	246	20	0	0	0	0.6
ENSP00000342381	187	201	15	0.1333	0	1	0.2
ENSP00000338774	182	196	15	0.1333	0	0.8	0.6667
ENSP00000338774	207	231	25	0.8	0	0	0.08
ENSP00000338774	287	301	15	0.9333	0	0	0.6667
ENSP00000338774	717	746	30	0.7667	0.5	0.1333	0.0667
ENSP00000385579	162	176	15	0	0	1	0.7333
ENSP00000385579	202	216	15	0	0	1	0.6
ENSP00000385579	337	351	15	0	0	1	0.3333
ENSP00000374235	286	300	15	0	0	1	0.5333
ENSP00000305595	2	36	35	0.0571	0	0	0.6
ENSP00000305595	252	271	20	0	0	1	0.6
ENSP00000338703	482	496	15	0	0	0	0.2
ENSP00000377920	347	361	15	0	0	1	0.2667
ENSP00000377920	402	416	15	0	0	1	0.5333
ENSP00000367220	27	51	25	0	0	1	0.28
ENSP00000364403	2	16	15	1	1	0	0.4
ENSP00000364403	2692	2711	20	0.1	0	0	0.4
ENSP00000315383	57	71	15	0	0	0	0.7333
ENSP00000305556	252	271	20	0.1	0	0	0.2
ENSP00000305556	282	296	15	0	0	1	0.6
ENSP00000282574	162	191	30	0.5667	0	0.5667	0.3333
ENSP00000264436	547	566	20	1	0	0	0.25
ENSP00000264447	2	31	30	1	0.3333	0	0
ENSP00000001146	2	31	30	0	0	0	0.8
ENSP00000258106	2	21	20	0.4	0.55	0	0
ENSP00000272433	2	16	15	0.2	1	0	0.8
ENSP00000350475	567	581	15	0	0	1	0.6
ENSP00000233630	2	26	25	0	0	0	0.64
ENSP00000258080	2	16	15	0.1333	0	0	0.2667
ENSP00000303522	277	291	15	0	0	1	1
ENSP00000377486	77	96	20	0.25	0	0	0.25
ENSP00000295057	2	36	35	0	0.3143	0	0.6857
ENSP00000295057	47	61	15	0	0	0	0.4
ENSP00000295057	87	116	30	0	0	0.8333	0.7
ENSP00000289753	127	141	15	0	0	1	0.6667
ENSP00000366553	32	46	15	1	0.0667	0	0.6
ENSP00000386660	627	646	20	0	0	0	0.55
ENSP00000283646	2	26	25	0.76	0.28	0	0.16
ENSP00000288943	7	26	20	0	0.4	0.45	0.8
ENSP00000288943	77	91	15	0	0	1	0.9333
ENSP00000258439	2	21	20	0.7	0.9	0	0
ENSP00000366275	57	71	15	0	0	0	0.4
ENSP00000258424	2	16	15	0	0	0	0.7333
ENSP00000289228	22	36	15	0	0	1	0.0667
ENSP00000377127	97	116	20	0	0.35	1	0.45
ENSP00000258428	312	331	20	1	0.55	0	0.15
ENSP00000338283	77	91	15	0	0	0.4667	0.6
ENSP00000338283	122	136	15	0	0	1	0.3333
ENSP00000338283	247	266	20	0	0	0.25	0.55
ENSP00000233969	672	686	15	1	0.0667	0	0.4667
ENSP00000258455	72	86	15	0	0	0	0.8
ENSP00000258456	302	316	15	0	0	1	0.8
ENSP00000258457	167	181	15	1	0	0	0
ENSP00000283195	327	341	15	0	0	0	0.3333
ENSP00000376943	52	66	15	1	0	0	0
ENSP00000376943	87	121	35	0.6286	0.2286	0	0.1143
ENSP00000331397	182	196	15	0	1	0	1
ENSP00000339109	2	16	15	0	0	0	0.7333
ENSP00000295206	7	21	15	1	0.5333	0	0.4
ENSP00000295206	82	101	20	1	0.95	0	0.25
ENSP00000263708	7	21	15	0.0667	0	0	0.6
ENSP00000263708	167	181	15	0	0	1	0
ENSP00000316779	362	376	15	1	0	0	0.2667
ENSP00000264211	192	216	25	1	0	0	0.32
ENSP00000295321	412	426	15	1	1	0	0.0667
ENSP00000325377	862	876	15	1	1	0	0
ENSP00000325377	882	906	25	1	0.24	0	0
ENSP00000259234	151	165	15	0.8	0	0	0.3333
ENSP00000259253	67	91	25	0	0	0	0.68
ENSP00000259253	857	891	35	0	0	0	0.7143
ENSP00000386377	302	316	15	0	0	0	0.7333
ENSP00000264157	2	16	15	0	0	0.4	0.3333
ENSP00000264157	627	691	65	0.9538	0.6	0	0.2615
ENSP00000264157	697	726	30	0.6	0	0	0.3667
ENSP00000387010	2	21	20	1	0	0	0.5
ENSP00000387010	422	436	15	1	0.0667	0	0
ENSP00000374135	47	61	15	0	0.7333	1	0.1333
ENSP00000374135	3212	3271	60	0	0	0	0.55
ENSP00000374135	3822	3836	15	0	0	0	0.4
ENSP00000374135	3927	3941	15	0	0	0	0.7333
ENSP00000295095	177	191	15	0	0	0.8	0.8667
ENSP00000302501	632	646	15	0	0	0	0.6
ENSP00000302501	1002	1021	20	0.25	0	1	0.7
ENSP00000386413	47	61	15	0	0	0.8667	0.4667
ENSP00000263895	12	26	15	0.0667	0	0.1333	0.3333
ENSP00000263895	57	71	15	0	0	1	0.6667
ENSP00000263895	197	211	15	0.5333	0.8	0	0.4
ENSP00000263904	72	86	15	0	0	1	0.6667
ENSP00000387239	387	406	20	0	0	0	0.7
ENSP00000387239	412	431	20	0	0	0.05	0.25
ENSP00000295101	2	16	15	0	0	0	0.7333
ENSP00000344479	2	91	90	0.1889	0.2778	0	0.2222
ENSP00000344479	457	501	45	0	0	1	0.5778
ENSP00000308610	227	251	25	0	0.6	1	0.72
ENSP00000259056	2	46	45	0	0	0	0.8
ENSP00000263640	492	506	15	0	0	0.1333	0.6
ENSP00000376534	322	336	15	1	0.1333	0	0.2
ENSP00000376534	347	371	25	0.84	0.28	0	0.6
ENSP00000376534	402	426	25	1	0.44	0	0.4
ENSP00000376534	677	711	35	1	0	0	0.2
ENSP00000376534	1092	1116	25	0	0	1	0.64
ENSP00000376534	1827	1841	15	0	0	0	0.4667
ENSP00000376534	1907	1931	25	0	0	0	1
ENSP00000368166	27	41	15	0	0	1	0.7333
ENSP00000283249	662	696	35	0	0	1	0.5143
ENSP00000294904	32	56	25	0.92	0.76	0	0
ENSP00000294904	272	291	20	0	0	0	0.4
ENSP00000294904	392	406	15	1	0	0	0.0667
ENSP00000353731	67	86	20	0	0	0	0.6
ENSP00000353731	582	596	15	0	0	1	0.5333
ENSP00000263642	772	786	15	0	0	1	0.7333
ENSP00000331727	637	651	15	0	0	1	0.8
ENSP00000331727	662	676	15	0	0	0.0667	0.8
ENSP00000376486	357	381	25	1	0	0	0.12
ENSP00000376486	442	461	20	0.95	0	0	0.4
ENSP00000376486	642	691	50	0	0	0.2	0.56
ENSP00000376486	707	721	15	0	0	0	0
ENSP00000376486	727	751	25	0	0	0	0.76
ENSP00000263915	317	331	15	0.1333	0	1	0.5333
ENSP00000387195	34	48	15	0.0667	0	0	0.4
ENSP00000387195	59	73	15	1	0.9333	0	0
ENSP00000387195	274	303	30	0	0	0	0.4333
ENSP00000387195	579	598	20	0.75	0	0	0.2
ENSP00000303740	282	296	15	0	0	0	0.5333
ENSP00000303740	312	326	15	0	0	0	0.3333
ENSP00000364512	152	181	30	0	0	1	0.8333
ENSP00000290167	77	91	15	0	0	1	0.4667
ENSP00000316670	297	311	15	0	0	0	0.8667
ENSP00000263816	1292	1306	15	0	0	0.9333	0
ENSP00000284669	2	36	35	0	0	0.4	0.7429
ENSP00000284669	587	601	15	0	0	0	0.6667
ENSP00000260970	432	446	15	1	0.6	0	0.5333
ENSP00000350928	2	16	15	1	0.8	0	0
ENSP00000376361	196	215	20	0.1	0	0	0.2
ENSP00000354478	22	41	20	1	0.6	0	0.05
ENSP00000354478	62	91	30	0	0	0	0.0667
ENSP00000234198	2	16	15	0.2	0	0	0.4
ENSP00000264106	222	241	20	0	0	0	0.25
ENSP00000310301	407	421	15	0.5333	0	0	0.4667
ENSP00000295500	432	446	15	0	0	0	0.6667
ENSP00000264110	12	26	15	0	0	0	0.4667
ENSP00000249501	2	26	25	0	0.12	0	0.4
ENSP00000249501	152	166	15	0.8667	0	0	0.6
ENSP00000315949	122	176	55	0.7818	0.0909	0	0.1818
ENSP00000386498	417	431	15	1	0	0	0
ENSP00000376309	2	16	15	1	0.8	0	0.1333
ENSP00000347915	47	66	20	0	0	0	0.85
ENSP00000376295	670	684	15	0	0	1	0.2
ENSP00000344627	847	871	25	0.2	0	0	0.6
ENSP00000295108	272	316	45	0.0444	0	0.2889	0.3333
ENSP00000295108	332	356	25	0	0	0	0.48
ENSP00000329112	432	446	15	0	0	1	0.6
ENSP00000386732	107	121	15	0	0	1	0.4667
ENSP00000304408	1447	1466	20	0	0	0.95	0
ENSP00000363761	492	511	20	0	0	1	0.8
ENSP00000376161	112	136	25	0	0	1	0.68
ENSP00000260950	167	181	15	0	0	1	0.6667
ENSP00000260950	187	216	30	0	0	1	0.6667
ENSP00000317379	532	546	15	0	0	0	0.4667
ENSP00000351255	52	66	15	0	0	1	1
ENSP00000272771	2	16	15	0	0	0	0.1333
ENSP00000363745	2	16	15	0.8667	0	0	0.2667
ENSP00000363745	275	299	25	0	0	1	0.52
ENSP00000363745	455	474	20	0.4	1	0	0
ENSP00000363745	485	519	35	0.7714	0.9429	0	0.0857
ENSP00000363745	545	559	15	1	1	0	0
ENSP00000363745	615	629	15	1	0.6667	0	0.4
ENSP00000315702	2	16	15	0.0667	0	0	0.2667
ENSP00000295049	12	41	30	0.1667	0	0	0.3667
ENSP00000260926	2	16	15	1	0	0	0
ENSP00000260926	22	46	25	1	0	0	0.24
ENSP00000386901	152	166	15	0	0	1	1
ENSP00000386901	172	191	20	0	0	1	0.35
ENSP00000286201	317	331	15	0	0	1	0.4
ENSP00000363689	52	76	25	0	0	1	0.52
ENSP00000309570	122	136	15	0.3333	0.2	0	0.6667
ENSP00000309570	157	171	15	0	0	0	0.8
ENSP00000236996	72	86	15	0.8667	0	0	0.2667
ENSP00000376045	127	141	15	0	0	0	0.4
ENSP00000260985	367	381	15	0	0	1	0.6
ENSP00000264380	1772	1791	20	1	0	0	0.1
ENSP00000353508	187	201	15	1	0.1333	0	0.2
ENSP00000233072	2	16	15	0	0	0	0.6667
ENSP00000342235	2	21	20	0	0	0	0.5
ENSP00000342235	1252	1271	20	0.15	0	0	0.65
ENSP00000342235	1292	1306	15	0.6667	0	0	0
ENSP00000342876	98	137	40	0.275	0	0	0.5
ENSP00000236959	77	96	20	0	0	1	0.35
ENSP00000233813	92	111	20	0.05	0	0	0.6
ENSP00000327137	2	16	15	0	0	0	0.9333
ENSP00000327137	57	71	15	0	0	1	0.8667
ENSP00000273077	132	146	15	0	0	1	0.9333
ENSP00000233944	82	96	15	1	0	0	0.2667
ENSP00000233948	242	256	15	0	0	1	0.8667
ENSP00000258411	287	311	25	0.56	0	1	0.44
ENSP00000295728	132	146	15	0	0	1	0.2667
ENSP00000248437	7	26	20	0	0	1	0.65
ENSP00000281821	232	256	25	0	0	0	0.28
ENSP00000281821	872	886	15	0.0667	0	0.4667	0.6667
ENSP00000281821	922	936	15	0	0	1	0.3333
ENSP00000343052	277	296	20	0.7	0	0	0.25
ENSP00000343052	352	391	40	0.825	0	1	0.1
ENSP00000350012	42	56	15	0.2	0	0	0.5333
ENSP00000350012	687	711	25	0	0	0	0.64
ENSP00000264414	32	56	25	0	0	0.92	0.76
ENSP00000264414	747	766	20	0	0	0.75	0.65
ENSP00000304895	2	26	25	0.28	0	0.48	0.08
ENSP00000304895	32	71	40	0.2	0	1	0.425
ENSP00000283946	2	16	15	0	0	0	0.4
ENSP00000309474	22	36	15	0	0	0	1
ENSP00000305877	87	101	15	0	0.2	1	0.4
ENSP00000258416	17	36	20	1	0	0	0.2
ENSP00000302251	2	16	15	0	0	0	0.3333
ENSP00000302251	22	36	15	0.4667	0	0	0.2
ENSP00000302251	47	66	20	0.7	0.55	0	0.05
ENSP00000302251	177	191	15	1	0	0	0.1333
ENSP00000254654	147	166	20	0	0	1	0.6
ENSP00000270357	92	106	15	0	0	1	0.6667
ENSP00000380616	2	16	15	0	0.7333	0	0.6
ENSP00000380616	272	286	15	0	0	1	0.4
ENSP00000363500	77	91	15	0	0	0	0.6
ENSP00000256496	2	16	15	0	0	0.2667	0.9333
ENSP00000373987	2	71	70	0	0.2143	0	0.5286
ENSP00000373987	87	131	45	0	0	1	0.4444
ENSP00000373987	147	171	25	0	0.8	1	0.68
ENSP00000373987	837	871	35	0	0	0.3429	0.6571
ENSP00000254488	597	616	20	0	0	0	0.2
ENSP00000273037	2	16	15	0	0	0.2667	0.8667
ENSP00000287820	247	266	20	0	0	0	0.65
ENSP00000251849	167	191	25	0	0	0.76	0.28
ENSP00000251849	212	226	15	1	0	0	0.6667
ENSP00000285018	37	51	15	0	0	1	0.5333
ENSP00000285018	137	161	25	0	0	1	0.12
ENSP00000320447	72	86	15	0.3333	0	0	0.4667
ENSP00000320447	257	271	15	0.2	0	0	0.2667
ENSP00000285083	227	246	20	0	0	1	0.75
ENSP00000333367	4	38	35	1	0	0	0.2571
ENSP00000333367	219	248	30	0	0	0	0.8
ENSP00000333367	339	353	15	0.6667	0	0	0.6
ENSP00000333367	414	433	20	0.2	0	1	0.7
ENSP00000333367	484	503	20	0.95	0	0.75	0.5
ENSP00000328813	222	236	15	0	0	0	0.8
ENSP00000328813	372	391	20	0	0	1	0.65
ENSP00000328813	612	626	15	0	0	1	0.4667
ENSP00000263754	627	641	15	0	0	0	0.4667
ENSP00000263754	812	826	15	0	0	0.2	1
ENSP00000303709	2	21	20	1	0.85	0	0.05
ENSP00000280696	177	191	15	0	0	0.9333	0.4667
ENSP00000373282	2	16	15	0	0	0	0.2667
ENSP00000326763	2	36	35	0	0	0.1143	0.7143
ENSP00000326763	47	61	15	0	0	1	0.2667
ENSP00000326763	82	96	15	0	0	1	0.8667
ENSP00000295770	2	21	20	0.6	0	0	0
ENSP00000363452	472	486	15	0	0	1	1
ENSP00000379804	72	86	15	0.3333	0.1333	0.6667	0.6667
ENSP00000330060	52	66	15	0	0	0	0.6
ENSP00000330060	72	91	20	0.15	0	0	0.7
ENSP00000307387	12	31	20	0	0	1	0.5
ENSP00000340361	477	501	25	0	0	0	0.64
ENSP00000343140	1107	1126	20	1	0	0	0.2
ENSP00000343140	1247	1271	25	1	0.84	0	0.04
ENSP00000350531	47	61	15	1	0	1	1
ENSP00000385604	182	196	15	0.0667	0	0	0.8
ENSP00000385604	752	781	30	0.8333	0	0	0.2667
ENSP00000232978	187	201	15	1	0.5333	0	0.1333
ENSP00000344125	67	86	20	0	0	0	0.5
ENSP00000344125	102	116	15	0	0	0	0.2
ENSP00000373249	47	61	15	0	1	0	0.8667
ENSP00000296127	277	296	20	0	0	0	0.75
ENSP00000296127	312	326	15	0	0	0	0
ENSP00000363389	2	16	15	0	0	0.6	0.4667
ENSP00000386759	585	604	20	0.45	0	0	0.4
ENSP00000265565	327	341	15	0	0.4667	1	0.7333
ENSP00000303706	2	16	15	1	0	0	0.4
ENSP00000296440	857	881	25	1	0	0	0.08
ENSP00000379047	127	141	15	0	0	0	0.7333
ENSP00000252992	87	101	15	1	0	0	0.1333
ENSP00000342621	27	41	15	0	0	1	0.6667
ENSP00000378885	105	129	25	0	0	0	0.48
ENSP00000348769	87	101	15	0	0	0	0.8667
ENSP00000350094	372	396	25	0.12	0	0	0.56
ENSP00000265560	547	561	15	0	0	1	0.1333
ENSP00000312435	842	856	15	1	0	1	0
ENSP00000312435	872	891	20	1	0.4	1	0
ENSP00000296452	82	101	20	1	0	0	0
ENSP00000296452	247	261	15	1	0	0	0
ENSP00000296452	277	321	45	1	0.4667	0	0.1333
ENSP00000296452	402	416	15	1	1	0	0
ENSP00000296452	447	461	15	0.8667	0.6667	0	0.4
ENSP00000296452	3602	3616	15	1	0	0	0
ENSP00000363314	42	61	20	0	0	1	0.65
ENSP00000266022	17	66	50	1	0	0	0.06
ENSP00000266022	112	131	20	1	0.2	0	0
ENSP00000266022	237	251	15	1	0	0	0
ENSP00000266022	302	316	15	1	0	0	0
ENSP00000343054	737	751	15	0.9333	0	0.6	0.2667
ENSP00000353104	282	311	30	0	0	0	0.8333
ENSP00000232496	67	81	15	0.0667	0	0	0.7333
ENSP00000266025	112	131	20	0	0	1	0.9
ENSP00000296479	670	684	15	0	0	0	0.5333
ENSP00000385335	352	381	30	0.1667	0.6333	0	0.2
ENSP00000385335	387	411	25	0.28	0.64	0	0.44
ENSP00000320485	557	576	20	1	1	0	0.15
ENSP00000320485	652	666	15	1	0.6	0	0
ENSP00000320485	1192	1206	15	1	0	0	0.2
ENSP00000296490	112	131	20	0	0	1	0.4
ENSP00000342290	122	146	25	0.16	0	1	0.24
ENSP00000233027	207	221	15	0	0	1	0.4667
ENSP00000273283	52	66	15	0	0	1	0.7333
ENSP00000378233	497	516	20	0	0	0.8	0.35
ENSP00000378233	652	666	15	0.8	0.3333	0	0.6667
ENSP00000378233	852	866	15	0	0	0.4	0.8667
ENSP00000288139	77	101	25	0.8	0	0	0.44
ENSP00000288139	1702	1806	105	1	0.0667	0	0.0762
ENSP00000340989	202	216	15	0	0	1	0.3333
ENSP00000295956	2	16	15	0.0667	0	0	0.2
ENSP00000295956	1892	1906	15	0.2	0	0.9333	0.3333
ENSP00000307241	337	351	15	0	0	0.8	0.4667
ENSP00000342087	102	116	15	0.2	0	0.1333	0.3333
ENSP00000283268	122	136	15	0	0	0	0.1333
ENSP00000295901	27	41	15	0.0667	0	0	0.4667
ENSP00000295901	337	351	15	0	0	1	0.5333
ENSP00000295903	62	86	25	0.04	0	1	0.24
ENSP00000295568	267	286	20	0	0	0	0.3
ENSP00000295569	122	136	15	0	0	1	0.3333
ENSP00000354340	22	56	35	0	0	0	0.3143
ENSP00000354340	67	86	20	0	0	0.9	0.65
ENSP00000273258	37	56	20	0	0	1	0.9
ENSP00000318902	97	111	15	0.0667	0.1333	0	0.6
ENSP00000337451	347	361	15	0	0	1	0.4
ENSP00000335400	382	401	20	1	0	0	0.05
ENSP00000377671	482	496	15	0.1333	0.3333	0	0.6
ENSP00000377655	127	156	30	0.4667	0	0	0.4333
ENSP00000377655	162	181	20	0.25	0	0	0.55
ENSP00000307801	107	121	15	0	0	1	0.4667
ENSP00000264122	2	16	15	1	0.7333	0	0
ENSP00000319974	612	626	15	0	0	0	0.6
ENSP00000264538	37	51	15	0	0	0.5333	1
ENSP00000264538	242	256	15	0	0	1	0.6667
ENSP00000321514	367	381	15	0.2	0.0667	0	0.4
ENSP00000283290	7	21	15	0	0	0.9333	0.6
ENSP00000283290	297	311	15	0	0	0.9333	0.4667
ENSP00000206423	897	911	15	0	0	0	0.8
ENSP00000206423	922	936	15	0	1	0	0
ENSP00000363189	2	36	35	0.7143	0.3143	0	0.2571
ENSP00000377416	52	66	15	0	0	0	0.6667
ENSP00000295878	232	246	15	0.2667	1	0	1
ENSP00000377375	75	114	40	0	0	0.525	0.675
ENSP00000377375	470	514	45	0.7778	0	0	0.5333
ENSP00000377375	550	594	45	0.1778	0	0.3778	0.2444
ENSP00000377375	710	739	30	0.1667	0	0	0.4667
ENSP00000328455	317	336	20	0	0.9	0	0.9
ENSP00000377370	287	311	25	0	0.64	0	0.68
ENSP00000350195	1087	1101	15	0	0	0	0.6
ENSP00000324806	212	231	20	0	0	1	0.45
ENSP00000324553	322	336	15	0	0	0	0.6667
ENSP00000283875	157	186	30	0.2333	0	0.6333	0.3667
ENSP00000311766	477	491	15	0	0	0	0.7333
ENSP00000353556	37	51	15	0	0	0	0.2667
ENSP00000353556	342	356	15	0	0	1	0.6667
ENSP00000353556	817	831	15	0	0	1	1
ENSP00000323313	262	301	40	0.3	0.15	0.6	0.4
ENSP00000308685	2	26	25	1	0	0	0.08
ENSP00000308685	912	926	15	0	0	0	1
ENSP00000353863	2	36	35	0.3143	0	0	0.3714
ENSP00000353863	612	631	20	0.6	0	0	0.25
ENSP00000296233	2	16	15	0	0	0	0
ENSP00000363131	2	16	15	0	0	0	0.2667
ENSP00000363131	157	171	15	0.2667	0	0	0.9333
ENSP00000347748	122	136	15	0	0	1	1
ENSP00000345359	542	566	25	0.52	0	1	0.4
ENSP00000345681	2	21	20	0.95	0	0	0.1
ENSP00000376968	157	171	15	0	0	1	0.4
ENSP00000366788	1262	1286	25	1	0	0	0.04
ENSP00000366788	1317	1351	35	0.7143	0	0	0.3143
ENSP00000366699	36	50	15	0.9333	0	0	0
ENSP00000366699	176	195	20	0	0.2	1	0.35
ENSP00000011700	3357	3371	15	0	0	1	0.4667
ENSP00000385420	2	36	35	0	0	0.6857	0.6286
ENSP00000310111	140	154	15	0.5333	0	0	0
ENSP00000364742	2	16	15	1	0	0	0.2
ENSP00000309262	47	61	15	0	0	0	0.2667
ENSP00000363827	2	21	20	0	0.9	0	0.7
ENSP00000344149	212	246	35	1	0.8286	0	0.3429
ENSP00000296271	17	31	15	0	0	1	0.3333
ENSP00000363463	292	316	25	0.96	0	1	0.04
ENSP00000341006	122	136	15	0	0	0.6	0.8667
ENSP00000363277	2	41	40	0.45	0	0	0.175
ENSP00000363277	287	301	15	0	0	1	0.4667
ENSP00000247087	1092	1116	25	0.28	0	0	0.28
ENSP00000247087	1487	1506	20	0.25	0	0	0.45
ENSP00000247087	1527	1601	75	0.64	0.3333	0	0.12
ENSP00000345652	42	61	20	0.15	0.55	1	0.75
ENSP00000263702	77	91	15	0	0	1	0.3333
ENSP00000362444	2	21	20	1	0	0	0
ENSP00000362135	67	81	15	0	0.9333	0.3333	0.8
ENSP00000362127	422	436	15	1	0.4667	0	0.1333
ENSP00000362127	457	481	25	1	0	0	0.16
ENSP00000362107	212	226	15	0	0	0.7333	0.0667
ENSP00000362103	212	226	15	1	1	0	0.2667
ENSP00000335376	47	81	35	0.5714	0.2571	1	0.2857
ENSP00000361653	587	601	15	1	0	0	0.4
ENSP00000339280	437	451	15	0	0.6	0	1
ENSP00000361327	112	126	15	0	0	0	0.5333
ENSP00000361090	77	91	15	0	0	1	0.6
ENSP00000257177	592	611	20	1	0	0	0.15
ENSP00000360129	82	96	15	0	0	0	0.3333
ENSP00000360108	229	243	15	0	0	0	0.8
ENSP00000237247	391	425	35	1	0.2	0	0.2
ENSP00000237247	558	572	15	0	0	0	0.6667
ENSP00000360034	2	26	25	0.44	0	0	0.16
ENSP00000360034	32	46	15	1	1	0	0.3333
ENSP00000360034	357	371	15	1	0.6	0	0.0667
ENSP00000294638	52	66	15	0	1	0	0
ENSP00000359640	92	106	15	0	0	0	0.8
ENSP00000212355	137	156	20	0.2	0	0	0.45
ENSP00000359211	52	76	25	0	0	0	0.36
ENSP00000359211	357	371	15	0	0	0	0.6667
ENSP00000359211	997	1016	20	0	0	0	0.35
ENSP00000263177	297	311	15	0	0	0	0.4
ENSP00000287474	567	581	15	0	0	0	1
ENSP00000384037	98	112	15	0	0	1	0.2667
ENSP00000264993	212	231	20	1	0	0	0.6
ENSP00000358886	107	126	20	1	0.45	0	0.05
ENSP00000358880	2	21	20	0	0.6	0	0.6
ENSP00000358810	607	621	15	0	0	1	0.8
ENSP00000358778	27	46	20	0	0	0	0.65
ENSP00000358778	502	531	30	0.3333	0	0	0.4667
ENSP00000358644	107	131	25	0	0.28	0	0.12
ENSP00000355396	82	96	15	0	0	0	0.3333
ENSP00000345505	242	256	15	0	0	1	0.6
ENSP00000358437	443	462	20	1	0	0	0
ENSP00000358359	1070	1094	25	0	0	0	0.92
ENSP00000358359	1190	1204	15	0.3333	0.7333	0	0.6667
ENSP00000314103	367	381	15	1	0.0667	0	0
ENSP00000234739	252	266	15	1	0.7333	0	0
ENSP00000234739	807	831	25	1	0.56	0	0
ENSP00000234739	912	926	15	1	0	0	0
ENSP00000234739	1082	1101	20	1	0	0	0
ENSP00000234739	1182	1196	15	1	0	0	0
ENSP00000240986	147	161	15	0	0	0.0667	1
ENSP00000358154	22	36	15	1	0	0	0.4667
ENSP00000385479	22	36	15	1	0	0	0.4667
ENSP00000307369	132	146	15	1	0	0	0.3333
ENSP00000271915	2	16	15	1	0	0	0
ENSP00000271915	117	151	35	1	0.4	0	0.0857
ENSP00000271915	252	271	20	0.35	0	0.15	0.05
ENSP00000271915	282	301	20	0	0	1	0.75
ENSP00000357432	102	131	30	1	0.4	0	0.2
ENSP00000357304	402	421	20	1	0	0	0.1
ENSP00000372689	1157	1181	25	0.92	0	0	0.2
ENSP00000010299	206	225	20	0.75	0	0	0.1
ENSP00000356992	547	561	15	1	0	0	0.4
ENSP00000288986	342	356	15	0	0	1	0.5333
ENSP00000346404	32	46	15	0	0	0	0.3333
ENSP00000258349	2	21	20	0	0	0.4	0.15
ENSP00000258349	997	1011	15	1	0.2667	0	0.3333
ENSP00000305343	92	106	15	0	0	0.2667	0.2
ENSP00000305343	117	131	15	0.0667	0	0	0.4
ENSP00000305343	222	236	15	0	0	0	0
ENSP00000356658	207	221	15	0	0	1	0.8
ENSP00000356595	682	696	15	0.5333	0	0	0.2667
ENSP00000356595	767	796	30	1	0	0	0.0333
ENSP00000356595	1042	1056	15	1	0.5333	1	0
ENSP00000271588	4877	4891	15	0	0	1	0.5333
ENSP00000271588	5322	5361	40	0	0	0.825	0.075
ENSP00000271588	5387	5421	35	0.1143	0.4286	0	0.7143
ENSP00000271588	5552	5571	20	0	0	0	0.55
ENSP00000356375	377	421	45	0.3111	0	0.6667	0.2
ENSP00000356239	977	996	20	0.6	0	0	0.65
ENSP00000235790	273	292	20	0	0	1	0.6
ENSP00000289094	1	25	25	0	0	0	0.36
ENSP00000264515	122	141	20	0	0	0	0.5
ENSP00000264515	397	416	20	1	0	0	0.2
ENSP00000350718	27	46	20	1	0.15	0	0
ENSP00000356110	207	231	25	1	1	0	0.48
ENSP00000356105	332	346	15	0	0	0	0.2667
ENSP00000356076	27	41	15	0.5333	0	0	0.3333
ENSP00000355986	32	56	25	0	0.4	0	0.76
ENSP00000355986	292	306	15	0	0	1	0.6
ENSP00000355925	2	36	35	0.4857	0	0	0.6571
ENSP00000355925	67	106	40	0.4	0	1	0.525
ENSP00000355925	122	156	35	1	0	1	0.1143
ENSP00000355925	677	707	31	0	0	0.0968	0.5806
ENSP00000355910	1862	1901	40	0	0	0.2	0.35
ENSP00000355910	2437	2461	25	0.4	0	0.84	0.2
ENSP00000355910	3322	3341	20	0	0	0	0.3
ENSP00000355910	3357	3376	20	0	0	0	0.2
ENSP00000355893	77	101	25	0	0	1	0.92
ENSP00000289153	907	921	15	0	0	1	0.5333
ENSP00000284551	57	71	15	0.3333	0	0	0.2
ENSP00000333188	152	166	15	0.5333	0.6667	0	0
ENSP00000264183	132	146	15	1	0	0	0
ENSP00000264183	572	611	40	0.575	0	1	0.475
ENSP00000374444	102	116	15	0.4667	0	0	0.2667
ENSP00000263826	175	189	15	0	0	0.8	0.4667
ENSP00000286349	257	271	15	0	0	0	0.4667
ENSP00000263154	2	16	15	1	0	0	0.3333
ENSP00000263154	377	396	20	0	0	0	0
ENSP00000368632	22	36	15	1	0	0	0
ENSP00000367702	67	81	15	0	0	1	0.5333
ENSP00000376737	137	151	15	0	0	1	0.0667
ENSP00000298943	7	21	15	0	0.4667	0	0.6
ENSP00000286353	2	21	20	0	0.75	0	0.8
ENSP00000365529	57	71	15	0.5333	0.5333	0	0.2
ENSP00000365529	77	101	25	0	0	0	0.48
ENSP00000365529	122	156	35	0.1429	0	0	0.8
ENSP00000365411	237	251	15	0	0	1	0.3333
ENSP00000365388	162	176	15	0	0	1	0.8667
ENSP00000286364	562	576	15	0	0	0	0.8
ENSP00000364094	757	771	15	0	0.0667	1	0.8
ENSP00000362993	332	346	15	0	0	1	0.8667
ENSP00000279873	417	431	15	1	0	0	0.1333
ENSP00000263563	442	456	15	0	0	0	0.6667
ENSP00000299297	417	431	15	0	0	1	1
ENSP00000299299	87	101	15	0	0	0.9333	0.6667
ENSP00000264951	292	306	15	0	0	0	0.0667
ENSP00000332530	197	231	35	0	0	1	0.4
ENSP00000302108	2	26	25	0.36	0	0	0.2
ENSP00000302108	92	106	15	1	0	0	0.4
ENSP00000265997	2	16	15	1	0.2667	0	0.0667
ENSP00000265997	77	101	25	1	0.6	0	0
ENSP00000265997	362	386	25	0.44	0	0	0.24
ENSP00000336831	557	571	15	0	0	1	0.8
ENSP00000360293	197	216	20	0.95	0.5	0	0
ENSP00000360293	232	246	15	1	0.9333	0	0
ENSP00000348593	402	416	15	0	0	0.9333	0.4
ENSP00000359629	632	656	25	0	0.36	0	0.32
ENSP00000359234	27	41	15	0.5333	0.7333	0	0.2
ENSP00000359234	462	481	20	0.3	0	0	0.55
ENSP00000359212	42	56	15	0	0.0667	0	0.2
ENSP00000359212	67	81	15	0.2	0.0667	0	0.3333
ENSP00000295992	37	56	20	0	0	1	0.1
ENSP00000359149	32	51	20	0	0.6	1	0.85
ENSP00000359149	62	86	25	0	0	0.44	0.48
ENSP00000359149	137	151	15	0	0	0	0.4667
ENSP00000302120	87	101	15	0	0	0	0.3333
ENSP00000302120	107	141	35	0	0	0	0.4286
ENSP00000302120	462	486	25	0.12	0	0	0.36
ENSP00000345964	147	161	15	0.6	0	0	0.6
ENSP00000376636	42	56	15	0.1333	0	0	1
ENSP00000376636	147	161	15	0	0	0	1
ENSP00000358039	87	101	15	0	0.9333	0.8667	0.8
ENSP00000357830	82	96	15	0	0	1	0.5333
ENSP00000298492	2	21	20	0	0	0	0.4
ENSP00000345920	442	466	25	0.68	0	0	0.04
ENSP00000340736	177	191	15	0	0.2	1	0.4667
ENSP00000296051	7	21	15	0	0	0	0.1333
ENSP00000296051	607	621	15	0	0.5333	0	0.7333
ENSP00000296051	867	881	15	0	0	0	0.1333
ENSP00000363015	285	299	15	0.0667	0	1	0.4
ENSP00000374557	247	261	15	1	0	0.4667	0.1333
ENSP00000288937	97	111	15	0.0667	0	1	0.4
ENSP00000299492	667	686	20	0	0	1	0.75
ENSP00000299596	87	101	15	0	0	0	0.5333
ENSP00000340281	132	151	20	0.25	0	1	0.45
ENSP00000340281	247	261	15	0	0	1	0.7333
ENSP00000340281	312	326	15	0.0667	0	0	0.4667
ENSP00000347883	842	871	30	1	0.5333	0	0
ENSP00000376631	2	21	20	1	0.55	0	0.3
ENSP00000376631	122	136	15	0.6667	0	0.7333	0.4
ENSP00000376631	152	166	15	1	0	0.2667	0.2
ENSP00000368424	12	26	15	0.3333	0	1	0.3333
ENSP00000368424	67	86	20	0.15	0	1	0.35
ENSP00000368424	142	161	20	0.8	0	0.05	0.75
ENSP00000278379	297	316	20	0	0	1	0.65
ENSP00000278379	322	351	30	0	0.4667	1	0.7667
ENSP00000376628	122	136	15	0	0	1	0.1333
ENSP00000299413	7	21	15	1	0	0	0.0667
ENSP00000278198	2	31	30	0	0.2	0	0.3667
ENSP00000278198	602	636	35	0.2286	0	0	0.4286
ENSP00000039989	2	16	15	0	0	0	0.2
ENSP00000332744	7	26	20	0.4	0	0	0.45
ENSP00000324570	237	256	20	0	0	1	0.2
ENSP00000324570	447	461	15	0	0	0	0.6
ENSP00000257821	2	16	15	0	0	0	0.9333
ENSP00000257821	32	51	20	0.55	0	0	1
ENSP00000257821	122	166	45	0.2222	0	0	0.5778
ENSP00000257821	292	311	20	0.35	0	0	0.7
ENSP00000298834	668	682	15	1	0	0	0.3333
ENSP00000346566	1697	1711	15	0	0.1333	0	0.6
ENSP00000239940	112	136	25	0	0	0.96	0.56
ENSP00000351409	447	461	15	0	0	1	0.6
ENSP00000367721	27	46	20	0	0	0	0.5
ENSP00000354543	247	266	20	1	0.1	0	0.15
ENSP00000354543	272	291	20	1	0.85	0	0
ENSP00000354543	502	521	20	1	1	0	0.1
ENSP00000354543	592	626	35	0.8	0	0	0.0571
ENSP00000354543	762	776	15	1	0.9333	0	0.0667
ENSP00000322457	22	61	40	0.8	1	0	0.25
ENSP00000322457	92	111	20	0	0	0	0.5
ENSP00000339030	2	21	20	1	1	0	0.15
ENSP00000263846	22	41	20	0	0	0	0.9
ENSP00000257215	2	21	20	0	0	0	0.45
ENSP00000367282	128	147	20	0	0	1	0.5
ENSP00000367282	158	177	20	0	0	1	0.8
ENSP00000378295	536	550	15	1	0	0	1
ENSP00000310117	132	146	15	0.3333	0	0.9333	0.3333
ENSP00000348772	847	861	15	0	0	1	0.2
ENSP00000305899	2	26	25	0.64	0	0	0.28
ENSP00000305899	182	196	15	0	0	0	0.6
ENSP00000305899	327	351	25	0.48	0	0	0.08
ENSP00000305899	432	446	15	1	0.6	0	0.1333
ENSP00000304846	117	131	15	0	0	1	0.8
ENSP00000307093	57	71	15	1	0.4	1	0.3333
ENSP00000307093	377	401	25	1	0.04	1	0.08
ENSP00000282486	27	56	30	0	0	0	0.2667
ENSP00000352065	1341	1355	15	1	0.0667	0	0.6667
ENSP00000352065	1395	1409	15	1	0	0	0.3333
ENSP00000331581	182	196	15	0.8	0	0	0.5333
ENSP00000352262	197	216	20	1	0.8	0	0.05
ENSP00000352262	772	796	25	1	0.76	0	0.2
ENSP00000352262	932	1036	105	0.7905	0.1619	0	0.419
ENSP00000352262	3147	3161	15	0.9333	0	0	0
ENSP00000352262	3202	3226	25	1	0	0	0.24
ENSP00000352262	3277	3296	20	0.25	0	0	0.45
ENSP00000352262	3557	3571	15	1	0	0	0.2667
ENSP00000284259	92	136	45	0	0.2889	0	0.4444
ENSP00000330113	462	476	15	0	0	0	0.6
ENSP00000376473	107	126	20	0.95	0	1	0.15
ENSP00000376473	372	386	15	0	0	0	0.4667
ENSP00000352926	2	16	15	0.9333	0	0.1333	0.1333
ENSP00000352456	517	536	20	0	0	1	0.5
ENSP00000349076	1082	1096	15	0.3333	0	1	0
ENSP00000349076	1102	1116	15	0.5333	0.7333	1	0.4667
ENSP00000197268	342	356	15	0.0667	0	0	0.4
ENSP00000351957	112	171	60	0.05	0.7833	0	0.5167
ENSP00000351957	202	246	45	0	0	0	0.9556
ENSP00000379345	232	246	15	0	0	0	0.5333
ENSP00000251071	57	71	15	0.3333	0	0	0.2667
ENSP00000251071	237	256	20	0	0	0	0.4
ENSP00000251071	642	656	15	1	0	1	0
ENSP00000251071	827	846	20	0.45	0	1	0.4
ENSP00000310120	32	51	20	0	0	1	0.25
ENSP00000379029	1202	1216	15	1	0	0	0.0667
ENSP00000298910	52	66	15	0	0	0	0.5333
ENSP00000298910	2497	2511	15	0	0	0	0.6667
ENSP00000295926	417	441	25	1	0.92	0	0
ENSP00000335044	122	136	15	0.1333	0	0	0
ENSP00000335044	1162	1191	30	0.5667	0	0	0.4333
ENSP00000335044	1297	1311	15	1	0	0	0
ENSP00000335044	1367	1386	20	1	0	0	0
ENSP00000335044	1447	1471	25	1	0.56	0	0.2
ENSP00000335044	1802	1816	15	0	0	0	0.7333
ENSP00000320849	2	16	15	0.5333	0	0	0.2667
ENSP00000308689	32	46	15	0	0.2	0.3333	0.8667
ENSP00000354919	22	36	15	0	0	0	0.6667
ENSP00000323586	162	176	15	1	0	0	0
ENSP00000336799	187	201	15	0	0	1	0.3333
ENSP00000369634	582	606	25	0	0	0	0.72
ENSP00000369349	377	396	20	0	0	1	0.95
ENSP00000295930	72	86	15	1	1	0	0.1333
ENSP00000257895	297	311	15	0	0	0	0.6667
ENSP00000377469	7	21	15	1	0	0	0
ENSP00000300101	2	21	20	0	0	0.1	0.55
ENSP00000237696	62	76	15	0	0.4	1	0.6667
ENSP00000266643	72	91	20	1	0.8	0	0.05
ENSP00000377252	927	941	15	0	0	0.4	0.5333
ENSP00000327821	122	136	15	0	0	1	0.6667
ENSP00000229195	152	171	20	1	0.95	0	0
ENSP00000318262	122	136	15	0	0	1	0.5333
ENSP00000266671	17	51	35	0.4	0	0	0.0571
ENSP00000316176	77	91	15	0	0	1	0.4
ENSP00000266744	62	91	30	1	0.3	0	0.2667
ENSP00000258494	277	296	20	0.35	0	1	0.2
ENSP00000280758	12	66	55	0.0727	0	0	0.1818
ENSP00000280758	72	91	20	0	0	0	0.2
ENSP00000366843	142	161	20	1	0.65	0	0
ENSP00000366843	1107	1121	15	0.2	0	0	0.1333
ENSP00000376350	87	111	25	0	0.2	0	0.64
ENSP00000334373	472	486	15	0	0.5333	0	0.8667
ENSP00000333602	524	538	15	1	0	0	0.3333
ENSP00000333602	1574	1593	20	1	0.5	0	0.15
ENSP00000323580	252	266	15	0	0	1	0.8
ENSP00000313079	22	41	20	0	0.65	0	0.4
ENSP00000313079	57	71	15	0	0	0	0.3333
ENSP00000282344	17	31	15	0	0	0	0.4667
ENSP00000368920	87	101	15	0	0	0	0.7333
ENSP00000317053	72	91	20	1	1	0	0.25
ENSP00000317053	842	861	20	1	0	0	0
ENSP00000317053	917	931	15	1	0.2	0	0.1333
ENSP00000241274	2	31	30	0	0	0	0.5667
ENSP00000241274	47	71	25	0	0	0	0.56
ENSP00000241274	797	811	15	1	0	0	0.2667
ENSP00000241274	922	971	50	0.12	0	0	0.56
ENSP00000374447	162	176	15	0	0	0	0.4667
ENSP00000367151	347	361	15	0.0667	0	0.2667	0.4667
ENSP00000367151	777	791	15	0.3333	0	0	0.3333
ENSP00000384288	2	36	35	0.0286	0.3429	0	0.3429
ENSP00000384288	2517	2536	20	0	0	0	0.25
ENSP00000366413	7	26	20	0.9	0	0	0.05
ENSP00000261574	857	871	15	0	0	0	0.9333
ENSP00000264677	97	136	40	0	0	1	0.825
ENSP00000365538	322	336	15	0	0	0	0.8667
ENSP00000365080	17	61	45	0.1111	0	0	0.6889
ENSP00000365080	112	136	25	0.92	0.6	0	0.36
ENSP00000365080	217	236	20	0	0	0	0.65
ENSP00000349145	812	836	25	0	0	1	0.64
ENSP00000364893	118	132	15	0	0	0	0.8667
ENSP00000374195	2	16	15	0	0	0.1333	0.6
ENSP00000319601	67	81	15	0	0	1	0.4667
ENSP00000309893	37	56	20	0	0	0	1
ENSP00000298694	547	566	20	1	0.5	0	0.25
ENSP00000264674	287	316	30	0.0667	0.5	0	0.0333
ENSP00000264674	332	346	15	1	0	0	0
ENSP00000264674	362	461	100	0.83	0	0	0.17
ENSP00000264674	467	526	60	0.0833	0	0	0.2333
ENSP00000340467	267	286	20	0	0	0	0.3
ENSP00000302647	2037	2051	15	0.9333	0	0	0.1333
ENSP00000216807	287	321	35	0	0	0	0.4857
ENSP00000326846	2	21	20	0	0	0	0.55
ENSP00000326846	277	301	25	0	0	0	0.56
ENSP00000334448	2	16	15	0	0	0.4667	0.6667
ENSP00000350261	2	16	15	0	0	0	0.5333
ENSP00000350261	67	91	25	0	0.44	0	0.72
ENSP00000350261	542	566	25	0.04	0	0	0.6
ENSP00000378851	283	297	15	1	0.9333	0	0
ENSP00000313159	62	76	15	0.0667	0	0	0.2667
ENSP00000247178	2	16	15	0.7333	0	0	0.0667
ENSP00000298406	2	21	20	1	0.95	0	0
ENSP00000298406	267	281	15	0	0	1	0.8
ENSP00000347930	197	211	15	0	0	1	0.6
ENSP00000374373	1471	1485	15	0.2	0	0.0667	0.8667
ENSP00000386220	152	166	15	1	0	0	0
ENSP00000341351	922	941	20	1	0	0	0.15
ENSP00000336729	17	41	25	0.32	0.52	0	0.52
ENSP00000377892	232	256	25	1	0.84	0	0.12
ENSP00000005198	702	716	15	1	0.0667	0	0.3333
ENSP00000261973	292	351	60	0.25	1	0	0.8833
ENSP00000347169	272	291	20	0.8	0	1	0.25
ENSP00000311224	32	56	25	0	0	1	0.6
ENSP00000311224	62	76	15	0	0	1	0
ENSP00000251038	547	561	15	0.3333	0	0	0.2
ENSP00000261303	2	16	15	1	0.6667	0	0
ENSP00000335615	2	21	20	0.95	0	0	0.05
ENSP00000335615	47	66	20	0.7	0	0	0.25
ENSP00000335615	112	126	15	0	0	0	0.8
ENSP00000335615	147	161	15	0	0	1	0.6667
ENSP00000335615	252	266	15	0	0	1	0.5333
ENSP00000335615	292	306	15	0	0	1	0.4
ENSP00000352510	322	341	20	0	0	0	0.45
ENSP00000321834	772	786	15	0	0	1	0.5333
ENSP00000338523	402	416	15	0	0	1	0.3333
ENSP00000338523	677	691	15	0.3333	0	0.5333	0.3333
ENSP00000232165	2	36	35	0	0	0	0.6
ENSP00000232165	837	851	15	0	0.3333	1	0.6
ENSP00000299084	12	26	15	0	0	0.6667	0.6667
ENSP00000260356	517	531	15	0	0	1	0
ENSP00000374280	222	241	20	0.75	0.95	0	1
ENSP00000374280	472	486	15	0	0	0	0.4
ENSP00000374581	928	952	25	0.76	0	0	0.28
ENSP00000374581	1018	1037	20	1	0.2	0	0
ENSP00000374581	1068	1082	15	1	0	0	0.6667
ENSP00000326281	287	306	20	0.45	0	1	0.3
ENSP00000326281	613	627	15	1	0	0	0
ENSP00000263805	2	21	20	0.7	0	0	0.05
ENSP00000263805	197	236	40	0.925	0	0	0.125
ENSP00000263805	242	256	15	1	0	0	0
ENSP00000263805	787	801	15	0.2	0	0	0.7333
ENSP00000348564	87	101	15	1	0.8	0	0
ENSP00000348564	117	131	15	1	1	0	0.0667
ENSP00000348564	197	251	55	1	0	0	0.0909
ENSP00000348564	317	331	15	0	0.7333	0	0.8667
ENSP00000348564	997	1026	30	0.5	0	0	0.2667
ENSP00000304750	17	36	20	0.5	0.15	0	0.1
ENSP00000304750	1036	1060	25	0.8	0	0	0.28
ENSP00000300283	52	71	20	0.05	0	0.9	0.15
ENSP00000379965	197	221	25	0	0	0	0.72
ENSP00000385750	629	643	15	0.2	0	0	0
ENSP00000385750	754	783	30	0.5	0	0	0.3667
ENSP00000324857	162	176	15	0	0	1	0.2
ENSP00000324857	1032	1056	25	1	0	0	0
ENSP00000325527	247	286	40	0	0	1	0.3
ENSP00000325527	832	846	15	0	0	0	0.2
ENSP00000325527	2447	2466	20	0	0	1	0.3
ENSP00000325527	2847	2866	20	0	0	0	0.3
ENSP00000299338	162	181	20	0	0	0	0.5
ENSP00000284509	282	301	20	0	0.65	1	0.6
ENSP00000370259	187	206	20	0.35	0	0	0.35
ENSP00000311221	12	26	15	1	0.7333	0	0.2667
ENSP00000260435	92	106	15	1	0	0	0
ENSP00000288235	542	556	15	0.1333	0	1	0.2
ENSP00000346032	112	126	15	0	0	0.6	0.5333
ENSP00000261517	2	16	15	0	0	0.9333	0.9333
ENSP00000369681	107	121	15	0	0	0	0.7333
ENSP00000369638	507	521	15	0	0	0.7333	0.5333
ENSP00000316527	2	106	105	0.9143	0.181	0	0.2381
ENSP00000316527	112	146	35	1	0	0	0.2571
ENSP00000325634	457	476	20	0	0	0	0.55
ENSP00000336861	702	731	30	0	0	0	0.6
ENSP00000369374	2	16	15	0	0	0	0.5333
ENSP00000261858	2	16	15	0	0	0	0.6
ENSP00000261858	357	371	15	0	0	0	0.2
ENSP00000260363	532	556	25	0.64	0	0	0.32
ENSP00000260363	692	706	15	1	0.0667	0	0.3333
ENSP00000260363	712	776	65	0.4769	0.2154	0	0.4308
ENSP00000260363	847	871	25	0.16	0	0	0.72
ENSP00000369150	2	26	25	1	0	0	0.24
ENSP00000350260	112	126	15	0.8667	0.3333	0	0.1333
ENSP00000258883	407	421	15	0	0	1	0.2
ENSP00000299927	317	336	20	1	0.95	0	0.1
ENSP00000354718	787	816	30	1	0	0	0
ENSP00000354718	2577	2591	15	0.5333	0	0	1
ENSP00000368389	97	111	15	0	0	1	0.0667
ENSP00000353655	292	306	15	0	0	1	0.4667
ENSP00000259037	72	86	15	0	0	1	0.7333
ENSP00000293872	22	41	20	0.1	0	1	0.65
ENSP00000263966	572	596	25	0	0	1	0.4
ENSP00000372193	32	46	15	0.8667	0	0	0
ENSP00000262304	277	291	15	0	0	0.8	0.3333
ENSP00000301727	2	26	25	0.84	0.68	0	0.72
ENSP00000296015	582	596	15	1	0	0	0
ENSP00000301740	422	441	20	1	0.7	0	0.1
ENSP00000301740	542	556	15	1	1	0	0.0667
ENSP00000350170	112	126	15	0	0	0.4667	0.2667
ENSP00000350170	497	516	20	1	0.45	0	0.35
ENSP00000371310	80	129	50	0	0	0.88	0.4
ENSP00000371310	1085	1099	15	0	0	0	0
ENSP00000371231	147	162	16	0	0	0	0.5625
ENSP00000349439	92	111	20	0	0	0	0.4
ENSP00000349439	217	231	15	0	0	0	0.6
ENSP00000323588	7	21	15	1	0.6667	0	0
ENSP00000292782	187	201	15	0	0	1	0.8
ENSP00000292782	242	256	15	0	0	0.4667	0.3333
ENSP00000289968	522	561	40	1	0	0	0.1
ENSP00000352232	127	141	15	0.9333	0.6667	0	0
ENSP00000262519	1007	1026	20	1	0.45	0	0.25
ENSP00000268281	477	491	15	0	0	0	0
ENSP00000378420	272	286	15	0	0	0	0.8667
ENSP00000378205	977	991	15	0	0	0.3333	0.2
ENSP00000290552	172	196	25	0.04	0	1	0.72
ENSP00000245157	212	236	25	0	0	0	0.52
ENSP00000242810	2	21	20	0	0	0	0.25
ENSP00000242810	32	51	20	0	0	0	0.3
ENSP00000242810	392	406	15	0	0.2	0.8667	0.5333
ENSP00000299237	202	216	15	0	0	1	0.2
ENSP00000368686	2	16	15	1	0.8	0	0
ENSP00000353646	1037	1051	15	0	0	0	0.5333
ENSP00000316589	2	16	15	1	0.1333	0	0
ENSP00000219343	202	216	15	0	0	1	0.8667
ENSP00000341171	297	311	15	0.9333	0	0	0.0667
ENSP00000299952	337	351	15	0	0	0	0.6667
ENSP00000348611	267	281	15	0	0	0	0.4667
ENSP00000377148	2	16	15	0	0.8	0	0.8
ENSP00000205061	2	21	20	0	0.45	0	0.85
ENSP00000205061	87	106	20	1	1	0	0
ENSP00000300086	67	86	20	0.05	0	0	0.7
ENSP00000327968	2	16	15	0.0667	0	0	0.2667
ENSP00000006951	337	351	15	0	0	1	0.5333
ENSP00000316054	697	711	15	0.8667	0	0.6667	0.4667
ENSP00000292808	102	116	15	0	0	0	0.0667
ENSP00000314949	2	26	25	0.4	0	0.44	0.28
ENSP00000250111	7	21	15	0	0	1	1
ENSP00000254846	337	401	65	1	0.3538	0	0.1231
ENSP00000254846	532	546	15	1	0.4667	0	0.0667
ENSP00000254846	612	651	40	1	0.425	0	0
ENSP00000369614	867	881	15	1	0	0	0
ENSP00000345774	32	46	15	0	0	1	1
ENSP00000005905	1197	1216	20	0	0	0	0.5
ENSP00000319104	1022	1036	15	0	0	0	0.4667
ENSP00000329933	432	476	45	0.5556	0	0	0.4889
ENSP00000329933	632	666	35	1	0	0	0.2571
ENSP00000225388	582	601	20	0.8	0	0	0.05
ENSP00000225388	652	666	15	0	0	0	0.5333
ENSP00000261716	232	246	15	0	0	1	0.4667
ENSP00000261716	252	266	15	0	0	1	0.8667
ENSP00000261716	967	996	30	1	0	0	0.3667
ENSP00000378296	152	166	15	0	0	1	0.5333
[truncated: 8,630 more rows]
